# Supplementary material for: All-cause mortality among patients treated with repurposed antivirals and antibiotics for COVID-19 in Mexico City: A real-world observational study
Source: PubMed Central journal article supplement (PMC7898041; doi:10.17179/excli2021-3413), 2021-02-04
Supplement: EXCLI-20-199-s-001.pdf [file EXCLI-20-199-s-001.pdf]

**Epidemiologic study of suspected viral respiratory disease**

**GENERAL INFORMATION**

Name of medical unit:

Date of registration in the platform:  dd/mm/yyyy Platform number:

Last Name:  Second Last Name:  Name(s):

Date of birth: Day:  Month:  Year:  CURP:

Sex: Man:  Woman:  Pregnant patient: Yes  No  Months of pregnancy:  Patient in puerperium: Yes  No  Days of puerperium:

Nationality: Mexican:  Foreigner:  Migrant: Yes  No  Country of nationality:  Country of origin:

Visited countries in the last three months: 1  2  3  Other:  Date of entry into Mexico:

Country of birth:  Place of birth (state):

Place of residency (state):  Municipality of residence:

Locality:

Street:  Number:

Between streets:  &

Suburb:  PC:  Telephone:

Indigenous self-identification: Yes  No  Speaker of indigenous language: Yes  No

Occupation:

Is the patient affiliated to an educational institution?

**CLINICAL DATA**

Admitted to (service):  Type of attention: 1=Ambulatory  2=Hospitalization

Date of admission:  dd/mm/yyyy Date of symptom onset:  dd/mm/yyyy

Since the onset of symptoms, has the patient...  
...had any of the following signs or symptoms?

|                          | Yes                      | No                       |                        | Yes                      | No                       |
|--------------------------|--------------------------|--------------------------|------------------------|--------------------------|--------------------------|
| Sudden onset of symptoms | <input type="checkbox"/> | <input type="checkbox"/> | Diabetes               | <input type="checkbox"/> | <input type="checkbox"/> |
| Fever                    | <input type="checkbox"/> | <input type="checkbox"/> | COPD                   | <input type="checkbox"/> | <input type="checkbox"/> |
| Cough                    | <input type="checkbox"/> | <input type="checkbox"/> | Asthma                 | <input type="checkbox"/> | <input type="checkbox"/> |
| Headache                 | <input type="checkbox"/> | <input type="checkbox"/> | Immunosuppression      | <input type="checkbox"/> | <input type="checkbox"/> |
| Shortness of breath      | <input type="checkbox"/> | <input type="checkbox"/> | Hypertension           | <input type="checkbox"/> | <input type="checkbox"/> |
| Irritability             | <input type="checkbox"/> | <input type="checkbox"/> | HIV/AIDS               | <input type="checkbox"/> | <input type="checkbox"/> |
| Chest pain               | <input type="checkbox"/> | <input type="checkbox"/> | Cardiovascular disease | <input type="checkbox"/> | <input type="checkbox"/> |
| Chills                   | <input type="checkbox"/> | <input type="checkbox"/> | Obesity                | <input type="checkbox"/> | <input type="checkbox"/> |
| Sore throat              | <input type="checkbox"/> | <input type="checkbox"/> | Chronic kidney disease | <input type="checkbox"/> | <input type="checkbox"/> |
| Myalgias                 | <input type="checkbox"/> | <input type="checkbox"/> | Smoker                 | <input type="checkbox"/> | <input type="checkbox"/> |
| Arthralgias              | <input type="checkbox"/> | <input type="checkbox"/> | Other                  | <input type="checkbox"/> | <input type="checkbox"/> |
| Anosmia                  | <input type="checkbox"/> | <input type="checkbox"/> |                        |                          |                          |
| Dysgeusia                | <input type="checkbox"/> | <input type="checkbox"/> |                        |                          |                          |
| Rhinorrhoea              | <input type="checkbox"/> | <input type="checkbox"/> |                        |                          |                          |
| Conjunctivitis           | <input type="checkbox"/> | <input type="checkbox"/> |                        |                          |                          |
|                          |                          |                          | Specify any others:    | <input type="text"/>     |                          |
| Other symptoms           | Yes                      | No                       |                        |                          |                          |
| Abrupt deterioration     | <input type="checkbox"/> | <input type="checkbox"/> |                        |                          |                          |
| Diarrhea                 | <input type="checkbox"/> | <input type="checkbox"/> |                        |                          |                          |
| Polypnea                 | <input type="checkbox"/> | <input type="checkbox"/> |                        |                          |                          |
| Abdominal pain           | <input type="checkbox"/> | <input type="checkbox"/> |                        |                          |                          |
| Vomit                    | <input type="checkbox"/> | <input type="checkbox"/> |                        |                          |                          |
| Cyanosis                 | <input type="checkbox"/> | <input type="checkbox"/> |                        |                          |                          |

Probable diagnosis: 1=Influenza-like illness (ILI)\*  2=Severe acute respiratory infection (SARI)

\*ILI is a mild respiratory disease

**TREATMENT**

Since the onset of symptoms, has the patient...  
 ...been treated with antipyretics? 

|     |    |
|-----|----|
| Yes | No |
|-----|----|

...been treated with antivirals? 

|     |    |
|-----|----|
| Yes | No |
|-----|----|

If the answer was yes:  
 Specify the antiviral:  | 1=Amantadine 2=Rimantadine 3=Oseltamivir  
 4=Zanamivir 5=Other, specify:

When was the antiviral medication started?  dd/mm/yyyy

In the medical unit...  
 ...were antibiotics started? 

|     |    |
|-----|----|
| Yes | No |
|-----|----|

...were antivirals started? 

|     |    |
|-----|----|
| Yes | No |
|-----|----|

Specify the antiviral:  | 1=Amantadine 2=Rimantadine 3=Oseltamivir  
 4=Zanamivir 5=Other, specify:

**EPIDEMIOLOGICAL HISTORY**

Has the patient had any contact with persons with respiratory disease in the last two weeks? 

|     |    |
|-----|----|
| Yes | No |
|-----|----|

During the weeks prior to symptom onset did the patient have contact with:  
 Birds: 

|     |    |
|-----|----|
| Yes | No |
|-----|----|

 Other animals:   
 Swine: 

|     |    |
|-----|----|
| Yes | No |
|-----|----|

Recent travels in the 7-day period before the onset of signs/symptoms:  
 Country:  City:

Did the patient receive last-year influenza vaccination? 

|     |    |
|-----|----|
| Yes | No |
|-----|----|

Date of vaccination:  dd/mm/yyyy

**LABORATORY**

Was a sample for testing obtained? 

|     |    |
|-----|----|
| Yes | No |
|-----|----|

Laboratory that will be processing the sample:

Site of sample:  | 1=Pharyngeal swab 2=Nasopharyngeal swab  
 3=Bronchoalveolar lavage 4=Pulmonary biopsy

Date sample was obtained:  dd/mm/yyyy

Result:

**FOLLOW-UP**

Follow-up status:  | 1=Discharged 2=Undergoing treatment/Referred/Domiciliary follow-up/End of follow-up  
 3=Severe case 4=Mild case 5=Death\*

In case of discharge: Indicate cause of discharge:  | 1=Improvement 2=Curation  
 3=Voluntary 4=Transferred

Has the patient been admitted to an ICU at any moment of the disease? 

|     |    |
|-----|----|
| Yes | No |
|-----|----|

Has the patient been put on invasive mechanical ventilation at any moment of the disease? 

|     |    |
|-----|----|
| Yes | No |
|-----|----|

Has the patient been diagnosed with pneumonia at any moment of the disease? 

|     |    |
|-----|----|
| Yes | No |
|-----|----|

Date of discharge:  dd/mm/yyyy

Specify if this is a positive COVID-19 case by association or clinical-epidemiological ruling: \*  
 \* Mark with an X only one of the following options  
 a. Confirmed COVID-19 by clinical-epidemiological association   
 b. Confirmed COVID-19 by clinical-epidemiological ruling (applies only for deaths)   
 c. No (none of the previous options)

Death: Date of death:  dd/mm/yyyy

Death Certificate (number):  \*Death due to influenza or COVID-19 

|     |    |
|-----|----|
| Yes | No |
|-----|----|

\*Attach a copy of the death certificate if the patient met criteria for suspected viral respiratory disease case

Name and position of person registering data \_\_\_\_\_ Name and position of authorizing person \_\_\_\_\_ Date of elaboration:  dd/mm/yyyy
