# Supplementary material for: All-cause mortality among patients treated with repurposed antivirals and antibiotics for COVID-19 in Mexico City: A real-world observational study
Source: PubMed Central journal article supplement (PMC7898041; doi:10.17179/excli2021-3413), 2021-02-04
Supplement: EXCLI-20-199-s-002.pdf [file EXCLI-20-199-s-002.pdf]

**Supplementary material to:**

**Original article:**

**ALL-CAUSE MORTALITY AMONG PATIENTS TREATED WITH  
REPURPOSED ANTIVIRALS AND ANTIBIOTICS FOR COVID-19 IN  
MEXICO CITY: A REAL-WORLD OBSERVATIONAL STUDY**

Javier Mancilla-Galindo<sup>1,2</sup>, Jorge Óscar García-Méndez<sup>2,3,4</sup>, Jessica Márquez-Sánchez<sup>5</sup>,  
Rodrigo Estefano Reyes-Casarrubias<sup>2,3</sup>, Eduardo Aguirre-Aguilar<sup>6</sup>,  
Héctor Isaac Rocha-González<sup>7</sup>, Ashuin Kammar-García<sup>6,7,\*</sup>

<sup>1</sup> Unidad de Investigación UNAM-INC, Instituto Nacional de Cardiología Ignacio Chávez, Mexico City, Mexico

<sup>2</sup> Facultad de Medicina, Universidad Nacional Autónoma de México, Mexico City, Mexico

<sup>3</sup> Departamento de Posgrado y Educación Médica Continua, Instituto Nacional de Cancerología, Mexico City, Mexico

<sup>4</sup> Departamento de Infectología, Fundación Clínica Médica Sur, Mexico City, Mexico

<sup>5</sup> Departamento de Infectología, Instituto Nacional de Pediatría, Mexico City, Mexico

<sup>6</sup> Departamento de Atención Institucional Continua y Urgencias, Instituto Nacional de Ciencias Médicas y Nutrición Salvador Zubirán, Mexico City, Mexico

<sup>7</sup> Sección de Estudios de Posgrado e Investigación, Escuela Superior de Medicina, Instituto Politécnico Nacional, Mexico City, Mexico

\* **Corresponding author:** A. Kammar-García, Departamento de Atención Institucional Continua y Urgencias, Instituto Nacional de Ciencias Médicas y Nutrición Salvador Zubirán, Mexico City, Mexico, Vasco de Quiroga 15, Tlalpan, Col. Belisario Domínguez Sección XVI, CP 14080 Ciudad de México, México. Tel: +52 5554870900, ext. 5010. E-mail: [kammar\\_nutrition@hotmail.com](mailto:kammar_nutrition@hotmail.com)

<https://orcid.org/0000-0002-3875-0945> (Ashuin Kammar-García)

<http://dx.doi.org/10.17179/excli2021-3413>

This is an Open Access article distributed under the terms of the Creative Commons Attribution License (<http://creativecommons.org/licenses/by/4.0/>).

- Supplementary Table 1:** Signs and symptoms in ambulatory patients
- Supplementary Table 2:** Signs and symptoms in hospitalized patients
- Supplementary Table 3:** Baseline and follow-up characteristics of survivors and non-survivors
- Supplementary Table 4:** Survival analysis of patients undergoing IMV
- Supplementary Table 5:** Survival analysis of patients admitted to ICU
- Supplementary Table 6:** Survival analysis of non-pregnant/puerperal adults
- Supplementary Table 7:** Survival analysis of children and adolescents
- Supplementary Table 8:** Survival analysis of pregnant women
- Supplementary Table 9:** Unadjusted Cox regression models for mortality in all patients, ambulatory, hospitalized, non-critical, and critical patients
- Supplementary Table 10:** Mortality risk in patients undergoing IMV
- Supplementary Table 11:** Mortality risk in patients admitted to ICU
- Supplementary Table 12:** Mortality risk in non-pregnant/puerperal adults
- Supplementary Table 13:** Mortality risk in children and adolescents
- Supplementary Table 14:** Mortality risk in pregnant women
- Supplementary Table 15:** E-values for the general population, ambulatory, hospitalized, non-critical, and critical patients
- Supplementary Table 16:** E-values for IMV, ICU, Non-pregnant/puerperal adults, and children and adolescents
- Supplementary Table 17:** Baseline characteristics of propensity score-matched patients treated with antivirals and controls
- Supplementary Table 18:** Baseline characteristics of propensity score-matched patients treated with Oseltamivir and controls
- Supplementary Table 19:** Baseline characteristics of propensity score-matched patients treated with antibiotics and controls
- Supplementary Table 20:** Baseline characteristics of patients with complete dates of antiviral initiation
- Supplementary Table 21:** Survival analysis of early and late use of antivirals

**Supplementary Figure 1:** Density functions of propensity score-matched patients treated with antivirals and controls before and after matching

**Supplementary Figure 2:** Density functions of propensity score-matched patients treated with Oseltamivir and controls before and after matching

**Supplementary Figure 3:** Density functions of propensity score-matched patients treated with antibiotics and controls before and after matching

**Supplementary Figure 4:** Timing of symptom onset, initiation of antiviral, and hospitalization

**Supplementary Figure 5:** Comparison of hospitalization rates between early and late use of antivirals

**Supplementary Appendix:** Case form: Epidemiologic study of suspected viral respiratory disease

**Supplementary Table 1:** Signs and symptoms in laboratory-confirmed COVID-19 ambulatory patients treated with antivirals and/or antibiotics in 603 accredited medical units in Mexico City between February 24, 2020 and September 14, 2020

|                                         | No antiviral/<br>antibiotic<br>n=98060 | Acyclovir<br>n=30      | Amantadine<br>n=282 | Lopinavir-<br>Ritonavir<br>n=8 | Oseltamivir<br>n=3187  | Rimantadine<br>n=48    | Zanamivir<br>n=19 | Antibiotic only<br>n=8268 | Total<br>n=109902 | p value |
|-----------------------------------------|----------------------------------------|------------------------|---------------------|--------------------------------|------------------------|------------------------|-------------------|---------------------------|-------------------|---------|
| Number of signs and symptoms, mean (SD) | 5.8 (3.8)                              | 6.8 (3.3) <sup>a</sup> | 7.2 (3.6)           | 7.9 (5.3)                      | 7.8 (3.3) <sup>a</sup> | 7.6 (3.2) <sup>a</sup> | 6.7 (4.6)         | 7.0 (3.5) <sup>a</sup>    | 5.9 (3.8)         | <0.0001 |
| Fever                                   | 52966 (54)                             | 21 (70)                | 169 (59.9)          | 5 (62.5)                       | 2465 (77.3)            | 31 (64.6)              | 13 (68.4)         | 5471 (66.2)               | 61141 (55.6)      | <0.0001 |
| Cough                                   | 65216 (66.5)                           | 19 (63.3)              | 216 (76.6)          | 6 (75)                         | 2583 (81)              | 34 (70.8)              | 15 (78.9)         | 6071 (73.4)               | 74160 (67.5)      | <0.0001 |
| Sore throat                             | 41927 (42.8)                           | 12 (40)                | 144 (51.1)          | 3 (37.5)                       | 1611 (50.5)            | 24 (50)                | 5 (26.3)          | 4388 (53.1)               | 48114 (43.8)      | <0.0001 |
| Shortness of breath                     | 19091 (19.5)                           | 11 (36.7)              | 63 (22.3)           | 4 (50)                         | 1010 (31.7)            | 12 (25)                | 8 (42.1)          | 2237 (27.1)               | 22436 (20.4)      | <0.0001 |
| Irritability                            | 16364 (16.7)                           | 5 (16.7)               | 70 (24.8)           | 2 (25)                         | 720 (22.6)             | 11 (22.9)              | 7 (36.8)          | 1593 (19.3)               | 18772 (17.1)      | <0.0001 |
| Diarrhea                                | 22096 (22.5)                           | 10 (33.3)              | 86 (30.5)           | 3 (37.5)                       | 981 (30.8)             | 12 (25)                | 7 (36.8)          | 2456 (29.7)               | 25651 (23.3)      | <0.0001 |
| Chest pain                              | 23150 (23.6)                           | 9 (30)                 | 87 (30.9)           | 2 (25)                         | 1158 (36.3)            | 19 (39.6)              | 7 (36.8)          | 2494 (30.2)               | 26926 (24.5)      | <0.0001 |
| Chills                                  | 32621 (33.3)                           | 14 (46.7)              | 139 (49.3)          | 6 (75)                         | 1585 (49.7)            | 27 (56.3)              | 5 (26.3)          | 3482 (42.1)               | 37879 (34.5)      | <0.0001 |
| Headache                                | 67181 (68.5)                           | 21 (70)                | 202 (71.6)          | 6 (75)                         | 2575 (80.8)            | 31 (64.6)              | 13 (68.4)         | 6022 (72.8)               | 76051 (69.2)      | <0.0001 |
| Myalgias                                | 47106 (48)                             | 23 (76.7)              | 175 (62.1)          | 5 (62.5)                       | 2053 (64.4)            | 32 (66.7)              | 8 (42.1)          | 4993 (60.4)               | 54395 (49.5)      | <0.0001 |
| Arthralgias                             | 42161 (43)                             | 18 (60)                | 155 (55)            | 4 (50)                         | 1881 (59)              | 31 (64.6)              | 6 (31.6)          | 4530 (54.8)               | 48786 (44.4)      | <0.0001 |
| Abrupt deterioration                    | 38549 (39.3)                           | 15 (50)                | 157 (55.7)          | 5 (62.5)                       | 1923 (60.3)            | 24 (50)                | 6 (31.6)          | 4471 (54.1)               | 45150 (41.1)      | <0.0001 |
| Rhinorrhea                              | 28354 (28.9)                           | 6 (20)                 | 107 (37.9)          | 4 (50)                         | 1079 (33.9)            | 23 (47.9)              | 6 (31.6)          | 2744 (33.2)               | 32323 (29.4)      | <0.0001 |
| Polypnea                                | 7412 (7.6)                             | 3 (10)                 | 37 (13.1)           | 3 (37.5)                       | 381 (12)               | 3 (6.3)                | 3 (15.8)          | 859 (10.4)                | 8701 (7.9)        | <0.0001 |
| Vomit                                   | 6406 (6.5)                             | 2 (6.7)                | 18 (6.4)            | 0 (0)                          | 309 (9.7)              | 6 (12.5)               | 1 (5.3)           | 696 (8.4)                 | 7438 (6.8)        | <0.0001 |
| Abdominal pain                          | 11502 (11.7)                           | 3 (10)                 | 49 (17.4)           | 0 (0)                          | 646 (20.3)             | 8 (16.7)               | 4 (21.1)          | 1065 (12.9)               | 13277 (12.1)      | <0.0001 |
| Conjunctivitis                          | 12784 (13)                             | 4 (13.3)               | 53 (18.8)           | 3 (37.5)                       | 475 (14.9)             | 11 (22.9)              | 5 (26.3)          | 1315 (15.9)               | 14650 (13.3)      | <0.0001 |
| Cyanosis                                | 2843 (2.9)                             | 1 (3.3)                | 9 (3.2)             | 1 (12.5)                       | 152 (4.8)              | 6 (12.5)               | 2 (10.5)          | 245 (3)                   | 3259 (3)          | <0.0001 |
| Sudden onset of symptoms                | 32348 (33)                             | 7 (23.3)               | 93 (33)             | 1 (12.5)                       | 1359 (42.6)            | 19 (39.6)              | 7 (36.8)          | 3067 (37.1)               | 36901 (33.6)      | <0.0001 |

Data expressed as frequency (%). P values were calculated by  $\chi^2$  or One-way ANOVA.

a: Statistical difference with respect to No antiviral/antibiotic  
SD: Standard deviation

**Supplementary Table 2:** Signs and symptoms in laboratory-confirmed COVID-19 hospitalized patients treated with antivirals and/or antibiotics in 329 accredited medical units in Mexico City between February 24, 2020 and September 14, 2020

|                                         | No antiviral /<br>antibiotic<br>n=16083 | Acyclovir<br>n=6 | Amantadine<br>n=37 | Lopinavir-<br>Ritonavir<br>n=92 | Oseltamivir<br>n=5227  | Rimantadine<br>n=13 | Zanamivir<br>n=20 | Antibiotic<br>only<br>n=5475 | Total<br>n=26953 | p value |
|-----------------------------------------|-----------------------------------------|------------------|--------------------|---------------------------------|------------------------|---------------------|-------------------|------------------------------|------------------|---------|
| Number of signs and symptoms, mean (SD) | 7.9 (3.4)                               | 6 (2.6)          | 7.9 (3.3)          | 6.6 (2.9) <sup>a</sup>          | 8.1 (3.4) <sup>a</sup> | 8.8 (2.4)           | 9.4 (2.8)         | 6.9 (3.2) <sup>a</sup>       | 7.8 (3.4)        | <0.0001 |
| Fever                                   | 13045 (81.1)                            | 4 (66.7)         | 29 (78.4)          | 76 (82.6)                       | 4498 (86.1)            | 11 (84.6)           | 18 (90)           | 4298 (78.5)                  | 21979 (81.5)     | <0.0001 |
| Cough                                   | 13151 (81.8)                            | 5 (83.3)         | 29 (78.4)          | 61 (66.3)                       | 4472 (85.6)            | 8 (61.5)            | 20 (100)          | 4300 (78.5)                  | 22046 (81.8)     | <0.0001 |
| Sore throat                             | 6918 (43)                               | 0 (0)            | 15 (40.5)          | 28 (30.4)                       | 2090 (40)              | 5 (38.5)            | 17 (85)           | 1853 (33.8)                  | 10926 (40.5)     | <0.0001 |
| Shortness of breath                     | 11970 (74.4)                            | 3 (50)           | 22 (59.5)          | 62 (67.4)                       | 4160 (79.6)            | 10 (76.9)           | 15 (75)           | 4264 (77.9)                  | 20506 (76.1)     | <0.0001 |
| Irritability                            | 3096 (19.3)                             | 0 (0.0)          | 11 (29.7)          | 5 (5.4)                         | 1273 (24.4)            | 3 (23.1)            | 6 (3)             | 932 (17)                     | 5326 (19.8)      | <0.0001 |
| Diarrhea                                | 3725 (23.2)                             | 1 (16.7)         | 10 (27)            | 16 (17.4)                       | 1199 (22.9)            | 3 (23.1)            | 6 (30)            | 1038 (19)                    | 5998 (22.3)      | <0.0001 |
| Chest pain                              | 6374 (39.6)                             | 3 (50.0)         | 18 (48.6)          | 20 (21.7)                       | 1821 (34.8)            | 6 (46.2)            | 8 (40)            | 1675 (30.6)                  | 9925 (36.8)      | <0.0001 |
| Chills                                  | 6784 (42.2)                             | 2 (33.3)         | 19 (51.4)          | 28 (30.4)                       | 2031 (38.9)            | 6 (46.2)            | 12 (60)           | 1521 (27.8)                  | 10403 (38.6)     | <0.0001 |
| Headache                                | 11712 (72.8)                            | 1 (16.7)         | 25 (67.6)          | 53 (57.6)                       | 3773 (72.2)            | 9 (69.2)            | 16 (80)           | 3378 (61.7)                  | 18967 (70.4)     | <0.0001 |
| Myalgias                                | 10086 (62.7)                            | 4 (66.7)         | 26 (70.3)          | 55 (59.8)                       | 3021 (57.8)            | 11 (84.6)           | 16 (80)           | 3052 (55.7)                  | 16271 (60.4)     | <0.0001 |
| Arthralgias                             | 9631 (59.9)                             | 4 (66.7)         | 24 (64.9)          | 44 (47.8)                       | 2965 (56.7)            | 11 (84.6)           | 17 (85)           | 2899 (52.9)                  | 15595 (57.9)     | <0.0001 |
| Abrupt deterioration                    | 10442 (64.9)                            | 5 (83.3)         | 23 (62.2)          | 61 (66.3)                       | 3444 (65.9)            | 10 (76.9)           | 14 (70)           | 3311 (60.5)                  | 17310 (64.2)     | <0.0001 |
| Rhinorrhea                              | 3781 (23.5)                             | 0 (0)            | 11 (29.7)          | 16 (17.4)                       | 1204 (23)              | 4 (30.8)            | 5 (25)            | 944 (17.2)                   | 5965 (22.1)      | <0.0001 |
| Polypnea                                | 4565 (28.4)                             | 0 (0)            | 9 (24.3)           | 10 (10.9)                       | 1466 (28)              | 4 (30.8)            | 3 (15)            | 1110 (20.3)                  | 7167 (26.6)      | <0.0001 |
| Vomit                                   | 1688 (10.5)                             | 1 (16.7)         | 5 (13.5)           | 7 (7.6)                         | 561 (10.7)             | 2 (15.4)            | 1 (5)             | 420 (7.7)                    | 2685 (10)        | <0.0001 |
| Abdominal pain                          | 2578 (16)                               | 0 (0)            | 11 (29.7)          | 8 (8.7)                         | 915 (17.5)             | 2 (15.4)            | 3 (15)            | 544 (9.9)                    | 4061 (15.1)      | <0.0001 |
| Conjunctivitis                          | 1493 (9.3)                              | 0 (0)            | 2 (5.4)            | 4 (4.3)                         | 487 (9.3)              | 0 (0)               | 1 (5)             | 304 (5.6)                    | 2291 (8.5)       | <0.0001 |
| Cyanosis                                | 1618 (10.1)                             | 0 (0)            | 3 (8.1)            | 3 (3.3)                         | 664 (12.7)             | 2 (15.4)            | 1 (5)             | 367 (6.7)                    | 2658 (9.9)       | <0.0001 |
| Sudden onset of symptoms                | 5259 (32.7)                             | 3 (50)           | 3 (8.1)            | 47 (51.1)                       | 2472 (47.3)            | 7 (53.8)            | 9 (45)            | 2022 (36.9)                  | 9822 (36.4)      | <0.0001 |

Data expressed as frequency (%). P values were calculated by  $\chi^2$  or One-way ANOVA.

a: Statistical difference with respect to No antiviral/antibiotic

SD: Standard deviation

**Supplementary Table 3:** Baseline and follow-up characteristics of laboratory confirmed COVID-19 survivors and non-survivors who received medical attention in 688 accredited units in Mexico City between February 24, 2020 and September 14, 2020

|                                 | <b>Total population<br/>n=136855</b> | <b>Survivors<br/>n=125176</b> | <b>Non-survivors<br/>n=11679</b> | <b>p Value</b> |
|---------------------------------|--------------------------------------|-------------------------------|----------------------------------|----------------|
| <b>Sex</b>                      |                                      |                               |                                  |                |
| Women                           | 66683 (48.7)                         | 62907 (50.3)                  | 3776 (32.3)                      | <0.0001        |
| Men                             | 70172 (51.3)                         | 62269 (49.7)                  | 7903 (67.7)                      |                |
| Age, mean (SD)                  | 44.2 (16.8)                          | 42.5 (15.9)                   | 62 (14.1)                        | <0.0001        |
| <b>Age categories</b>           |                                      |                               |                                  |                |
| 0-19 years                      | 7558 (5.5)                           | 7514 (6)                      | 44 (0.4)                         | <0.0001        |
| 20-29 years                     | 20098 (14.7)                         | 19974 (16)                    | 124 (1.1)                        |                |
| 30-39 years                     | 29434 (21.5)                         | 28909 (23.1)                  | 525 (4.5)                        |                |
| 40-49 years                     | 29553 (21.6)                         | 28084 (22.4)                  | 1469 (12.6)                      |                |
| 50-59 years                     | 24928 (18.2)                         | 22298 (17.8)                  | 2630 (22.5)                      |                |
| 60-69 years                     | 15070 (11)                           | 11840 (9.5)                   | 3230 (27.7)                      |                |
| 70-79 years                     | 7183 (5.2)                           | 4731 (3.8)                    | 2452 (21)                        |                |
| 80-89 years                     | 2594 (1.9)                           | 1540 (1.2)                    | 1054 (9)                         |                |
| 90-99 years                     | 419 (0.3)                            | 270 (0.2)                     | 149 (1.3)                        |                |
| ≥100 years                      | 18 (0.01)                            | 16 (0.01)                     | 2 (0.001)                        |                |
| Indigenous self-identification  | 713 (0.5)                            | 639 (0.5)                     | 74 (0.6)                         | 0.08           |
| <b>Occupation</b>               |                                      |                               |                                  |                |
| Technical services              | 1916 (1.4)                           | 1702 (1.4)                    | 214 (1.8)                        | <0.0001        |
| Education                       | 10006 (7.3)                          | 9923 (7.9)                    | 83 (0.7)                         |                |
| Healthcare                      | 17281 (12.6)                         | 16954 (13.5)                  | 327 (2.8)                        |                |
| Agricultural activities         | 302 (0.2)                            | 244 (0.2)                     | 58 (0.5)                         |                |
| Commerce                        | 50450 (36.9)                         | 47070 (37.6)                  | 3380 (28.9)                      |                |
| Other                           | 24630 (18)                           | 22383 (17.9)                  | 2247 (19.2)                      |                |
| Unemployed                      | 5685 (4.2)                           | 4539 (3.6)                    | 1146 (9.8)                       |                |
| Stay-at-home                    | 26585 (19.4)                         | 22361 (17.9)                  | 4224 (36.2)                      |                |
| Last-season flu vaccination     | 25691 (19.7)                         | 24570 (20.7)                  | 1121 (9.6)                       |                |
| <b>Special populations</b>      |                                      |                               |                                  |                |
| Pregnancy                       | 583 (0.9)                            | 573 (0.9)                     | 10 (0.3)                         | <0.0001        |
| Age during pregnancy, mean (SD) | 29.8 (7.4)                           | 29.8 (7.5)                    | 32.7 (6)                         | 0.2            |
| Last-season flu vaccination     | 161 (27.6)                           | 158 (27.6)                    | 3 (30)                           | 0.9            |
| <b>Pregnancy Age</b>            |                                      |                               |                                  |                |
| Early adolescent (≤14 years)    | 2 (0.3)                              | 2 (0.3)                       | 0 (0)                            | 0.2            |
| Late adolescent (15-19 years)   | 34 (5.8)                             | 34 (5.9)                      | 0 (0)                            |                |

|                                                  | <b>Total population<br/>n=136855</b> | <b>Survivors<br/>n=125176</b> | <b>Non-survivors<br/>n=11679</b> | <b>p Value</b> |
|--------------------------------------------------|--------------------------------------|-------------------------------|----------------------------------|----------------|
| Normal age (20-34 years)                         | 404 (69.3)                           | 398 (69.5)                    | 6 (60)                           |                |
| Advanced maternal age ( $\geq 35$ years)         | 143 (24.5)                           | 139 (24.3)                    | 4 (40)                           |                |
| <b>Trimester of pregnancy</b>                    |                                      |                               |                                  |                |
| First trimester                                  | 114 (19.6)                           | 114 (19.9)                    | 0 (0.0)                          | <0.0001        |
| Second trimester                                 | 177 (30.4)                           | 174 (30.4)                    | 3 (30)                           |                |
| Third trimester                                  | 292 (50.1)                           | 285 (49.7)                    | 7 (70)                           |                |
| Puerperium                                       | 103 (0.2)                            | 102 (0.2)                     | 1 (0.03)                         | 0.9            |
| <b>Days of puerperium</b>                        |                                      |                               |                                  |                |
| 1 day                                            | 33 (32)                              | 32 (31.4)                     | 1 (100)                          | 0.2            |
| 2-7 days                                         | 33 (32)                              | 33 (32.4)                     | 0 (0)                            |                |
| 8-42 days                                        | 37 (35.9)                            | 37 (36.3)                     | 0 (0)                            |                |
| Age during puerperium, mean (SD)                 | 31.9 (9.7)                           | 31.9 (9.7)                    | 24                               | 0.5            |
| Last-season flu vaccination                      | 22 (21.4)                            | 22 (21.6)                     | 0 (0)                            | 0.6            |
| Children and adolescents (<18 years)             | 5791 (4.2)                           | 5751 (4.6)                    | 40 (0.3)                         | <0.0001        |
| Age, mean (SD)                                   | 10.9 (5.2)                           | 10.9 (5.2)                    | 7.5 (6.4)                        | <0.0001        |
| Last-season flu vaccination                      | 1213 (20.9)                          | 1211 (21.1)                   | 2 (5)                            | 0.01           |
| Non-pregnant/puerperal adults ( $\geq 18$ years) | 130378 (95.3)                        | 118750 (94.9)                 | 11628 (99.6)                     | <0.0001        |
| Age, mean (SD)                                   | 45.7 (15.5)                          | 44.1 (14.7)                   | 62.2 (13.7)                      | <0.0001        |
| Last-season flu vaccination                      | 25691 (19.7)                         | 24570 (20.7)                  | 1121 (9.6)                       | <0.0001        |
| <b>Comorbidities</b>                             |                                      |                               |                                  |                |
| Diabetes                                         | 18229 (13.3)                         | 14136 (11.3)                  | 4093 (35)                        | <0.0001        |
| COPD                                             | 1741 (1.3)                           | 1184 (0.9)                    | 557 (4.8)                        | <0.0001        |
| Asthma                                           | 3035 (2.2)                           | 2858 (2.3)                    | 177 (1.5)                        | <0.0001        |
| Immunosuppression                                | 1758 (1.3)                           | 1380 (1.1)                    | 378 (3.2)                        | <0.0001        |
| Hypertension                                     | 22185 (16.2)                         | 17574 (14)                    | 4611 (39.5)                      | <0.0001        |
| HIV/AIDS                                         | 573 (0.4)                            | 509 (0.4)                     | 64 (0.5)                         | 0.02           |
| Cardiovascular disease                           | 2724 (2)                             | 2128 (1.7)                    | 596 (5.1)                        | <0.0001        |
| Obesity                                          | 23848 (17.4)                         | 21072 (16.8)                  | 2776 (23.8)                      | <0.0001        |
| Chronic kidney disease                           | 2067 (1.5)                           | 1298 (1)                      | 769 (6.6)                        | <0.0001        |
| Smoker                                           | 14727 (10.8)                         | 13437 (10.7)                  | 1290 (11)                        | 0.3            |
| Time from symptom onset to medical attention     | 4.5 (3.9)                            | 4.5 (3.8)                     | 4.9 (3.9)                        | <0.0001        |
| <b>Baseline symptoms</b>                         |                                      |                               |                                  |                |
| Fever                                            | 83120 (60.7)                         | 73561 (58.8)                  | 9559 (81.8)                      | <0.0001        |
| Cough                                            | 96206 (70.3)                         | 86484 (69.1)                  | 9722 (83.2)                      | <0.0001        |
| Sore throat                                      | 59040 (43.1)                         | 54325 (43.4)                  | 4715 (40.4)                      | <0.0001        |

|                                      | <b>Total population<br/>n=136855</b> | <b>Survivors<br/>n=125176</b> | <b>Non-survivors<br/>n=11679</b> | <b>p Value</b> |
|--------------------------------------|--------------------------------------|-------------------------------|----------------------------------|----------------|
| Shortness of breath                  | 42942 (31.4)                         | 33762 (27)                    | 9180 (78.6)                      | <0.0001        |
| Irritability                         | 24098 (17.6)                         | 21767 (17.4)                  | 2331 (20)                        | <0.0001        |
| Diarrhea                             | 31649 (23.1)                         | 29141 (23.3)                  | 2508 (21.5)                      | <0.0001        |
| Chest pain                           | 36851 (26.9)                         | 32498 (26)                    | 4353 (37.3)                      | <0.0001        |
| Chills                               | 48282 (35.3)                         | 43660 (34.9)                  | 4622 (39.6)                      | <0.0001        |
| Headache                             | 95018 (69.4)                         | 86872 (69.4)                  | 8146 (69.7)                      | 0.4            |
| Myalgias                             | 70666 (51.6)                         | 63547 (50.8)                  | 7119 (61.0)                      | <0.0001        |
| Arthralgias                          | 64381 (47)                           | 57539 (46)                    | 6842 (58.6)                      | <0.0001        |
| Abrupt deterioration                 | 62460 (45.6)                         | 54794 (43.8)                  | 7666 (65.6)                      | <0.0001        |
| Rhinorrhea                           | 38288 (28)                           | 35677 (28.5)                  | 2611 (22.4)                      | <0.0001        |
| Polypnea                             | 15868 (11.6)                         | 12283 (9.8)                   | 3585 (30.7)                      | <0.0001        |
| Vomit                                | 10123 (7.4)                          | 8956 (7.2)                    | 1167 (10)                        | <0.0001        |
| Abdominal pain                       | 17338 (12.7)                         | 15639 (12.5)                  | 1699 (14.5)                      | <0.0001        |
| Conjunctivitis                       | 16941 (12.4)                         | 15965 (12.8)                  | 976 (8.4)                        | <0.0001        |
| Cyanosis                             | 5917 (4.3)                           | 4430 (3.5)                    | 1487 (12.7)                      | <0.0001        |
| Sudden onset of symptoms             | 46723 (34.1)                         | 42636 (34.1)                  | 4087 (35)                        | 0.04           |
| Contact with confirmed COVID-19 case | 70923 (51.8)                         | 69506 (55.5)                  | 1417 (12.1)                      | <0.0001        |
| <b>Type of treatment received</b>    |                                      |                               |                                  |                |
| No antiviral / antibiotic            | 114143 (83.4)                        | 106792 (85.3)                 | 7351 (62.9)                      | <0.0001        |
| Antiviral only                       | 4044 (3)                             | 2980 (2.4)                    | 1064 (9.1)                       |                |
| Antibiotic only                      | 13743 (10)                           | 11788 (9.4)                   | 1955 (16.7)                      |                |
| Antiviral + antibiotic               | 4925 (3.6)                           | 3616 (2.9)                    | 1309 (11.2)                      |                |
| <b>Type of antiviral used</b>        |                                      |                               |                                  |                |
| Acyclovir                            | 36 (0.03)                            | 32 (0.03)                     | 4 (0.03)                         | <0.0001        |
| Amantadine                           | 319 (0.2)                            | 304 (0.2)                     | 15 (0.1)                         |                |
| Lopinavir-Ritonavir                  | 100 (0.1)                            | 75 (0.1)                      | 25 (0.2)                         |                |
| Oseltamivir                          | 8414 (6.1)                           | 6100 (4.9)                    | 2314 (19.8)                      |                |
| Rimantadine                          | 61 (0.04)                            | 54 (0.04)                     | 7 (0.1)                          |                |
| Zanamivir                            | 39 (0.03)                            | 31 (0.02)                     | 8(0.1)                           |                |

Data expressed as frequency (%) or median (SD). P values were calculated by  $\chi^2$  or Student's t-test.

SD: Standard deviation, COPD: Chronic obstructive pulmonary disease, HIV/AIDS: Human immunodeficiency virus/acquired immune deficiency syndrome



**Supplementary Table 4:** Survival analysis of laboratory-confirmed COVID-19 patients who underwent invasive mechanical ventilation (IMV) and were treated with antivirals and/or antibiotics in one of 197 accredited hospitals in Mexico City, between February 24, 2020 and September 14, 2020

| Group                                       | Total | Deaths | Survivors | Survival | p value   |
|---------------------------------------------|-------|--------|-----------|----------|-----------|
| Patients receiving IMV                      | 6752  | 5346   | 1406      | 20.8%    | -         |
| <b>Type of treatment</b>                    |       |        |           |          |           |
| No antiviral/antibiotic                     | 3931  | 3240   | 691       | 17.6%    | Reference |
| Antiviral only                              | 507   | 431    | 76        | 15.0%    | 0.001     |
| Antibiotic only                             | 1586  | 1087   | 499       | 31.5%    | <0.0001   |
| Antiviral + Antibiotic                      | 768   | 621    | 147       | 19.1%    | 0.3       |
| <b>Type of antiviral or antibiotic only</b> |       |        |           |          |           |
| No antiviral/antibiotic                     | 3931  | 3240   | 691       | 17.6%    | Reference |
| Acyclovir                                   | 2     | 2      | 0         | 0.0%     | 0.6       |
| Amantadine                                  | 7     | 7      | 0         | 0.0%     | 0.5       |
| Lopinavir-Ritonavir                         | 23    | 16     | 7         | 30.4%    | 0.1       |
| Oseltamivir                                 | 1235  | 1019   | 216       | 17.5%    | 0.2       |
| Rimantadine                                 | 3     | 3      | 0         | 0.0%     | 0.4       |
| Zanamivir                                   | 5     | 5      | 0         | 0.0%     | 0.9       |
| Antibiotic only                             | 1586  | 1087   | 499       | 31.5%    | <0.0001   |
| <b>Treatment with oseltamivir</b>           |       |        |           |          |           |
| No antiviral/antibiotic                     | 3931  | 3240   | 691       | 17.6%    | Reference |
| Oseltamivir                                 | 488   | 413    | 75        | 15.4%    | 0.01      |
| Antibiotic only                             | 1586  | 1087   | 499       | 31.5%    | <0.0001   |
| Oseltamivir + Antibiotic                    | 747   | 606    | 141       | 18.9%    | 0.4       |

Data expressed as number of patients or percentual of survival. p values were calculated by Log-Rank test.

**Supplementary Table 5:** Survival analysis of laboratory-confirmed COVID-19 patients treated with antivirals and/or antibiotics and admitted to one of 125 accredited intensive care units (ICU) in Mexico City, between February 24, 2020 and September 14, 2020

| Group                               | Total | Deaths | Survivors | Survival | p value   |
|-------------------------------------|-------|--------|-----------|----------|-----------|
| Patients admitted to ICU            | 2425  | 1475   | 950       | 39.2%    | -         |
| <b>Type of treatment</b>            |       |        |           |          |           |
| No antiviral/antibiotic             | 908   | 494    | 414       | 45.6%    | Reference |
| Antiviral only                      | 77    | 53     | 24        | 31.2%    | 0.001     |
| Antibiotic only                     | 1011  | 610    | 401       | 39.7%    | 0.02      |
| Antiviral + Antibiotic              | 461   | 336    | 125       | 27.1%    | <0.0001   |
| <b>Antiviral or antibiotic only</b> |       |        |           |          |           |
| No antiviral/antibiotic             | 908   | 494    | 414       | 45.6%    | Reference |
| Acyclovir                           | 1     | 1      | 0         | 0.0%     | 0.08      |
| Amantadine                          | 2     | 0      | 2         | 100.0%   | 0.20      |
| Lopinavir-Ritonavir                 | 29    | 17     | 12        | 41.4%    | 0.40      |
| Oseltamivir                         | 506   | 371    | 135       | 26.7%    | <0.0001   |
| Antibiotic only                     | 1011  | 610    | 401       | 39.7%    | 0.02      |
| <b>Oseltamivir</b>                  |       |        |           |          |           |
| No antiviral/antibiotic             | 908   | 494    | 414       | 45.6%    | Reference |
| Oseltamivir                         | 66    | 48     | 18        | 27.3%    | <0.0001   |
| Antibiotic only                     | 1011  | 610    | 401       | 39.7%    | 0.02      |
| Oseltamivir + Antibiotic            | 440   | 323    | 117       | 26.6%    | <0.0001   |

Data expressed as number of patients or percentual of survival. p values were calculated by Log-Rank test.

**Supplementary Table 6:** Survival analysis of laboratory-confirmed COVID-19 non-pregnant/puerperal adults treated with antivirals and/or antibiotics in 379 accredited medical units in Mexico City, between February 24, 2020 and September 14, 2020

| Group                                       | Total  | Deaths | Survivors | Survival | p value   |
|---------------------------------------------|--------|--------|-----------|----------|-----------|
| Non-pregnant/puerperal adults               | 129837 | 11569  | 118268    | 91.1%    | -         |
| <b>Type of treatment</b>                    |        |        |           |          |           |
| No antiviral/antibiotic                     | 108213 | 7314   | 100899    | 93.2%    | Reference |
| Antiviral only                              | 3990   | 1063   | 2927      | 73.4%    | <0.0001   |
| Antibiotic only                             | 13300  | 1945   | 11355     | 85.4%    | <0.0001   |
| Antiviral + Antibiotic                      | 4875   | 1306   | 3569      | 73.2%    | <0.0001   |
| <b>Type of antiviral or antibiotic only</b> |        |        |           |          |           |
| No antiviral/antibiotic                     | 108213 | 7314   | 100899    | 93.2%    | Reference |
| Acyclovir                                   | 36     | 4      | 32        | 88.9%    | 0.4       |
| Amantadine                                  | 308    | 15     | 293       | 95.1%    | 0.2       |
| Lopinavir-Ritonavir                         | 99     | 25     | 74        | 74.7%    | <0.0001   |
| Oseltamivir                                 | 8324   | 2310   | 6014      | 72.2%    | <0.0001   |
| Rimantadine                                 | 59     | 7      | 52        | 88.1%    | 0.1       |
| Zanamivir                                   | 39     | 8      | 31        | 79.5%    | 0.001     |
| Antibiotic only                             | 13300  | 1945   | 11355     | 85.4%    | <0.0001   |
| <b>Treatment with oseltamivir</b>           |        |        |           |          |           |
| No antiviral / Antibiotic                   | 108213 | 7314   | 100899    | 93.2%    | Reference |
| Oseltamivir                                 | 3738   | 1032   | 2706      | 72.4%    | <0.0001   |
| Antibiotic only                             | 13300  | 1945   | 11355     | 85.4%    | <0.0001   |
| Oseltamivir + Antibiotic                    | 4586   | 1278   | 3308      | 72.1%    | <0.0001   |

Data expressed as number of patients or percentual of survival. p values were calculated by Log-Rank test.

**Supplementary Table 7:** Survival analysis of laboratory-confirmed COVID-19 children and adolescents treated with antivirals and/or antibiotics in 273 accredited medical units in Mexico City, between February 24, 2020 and September 14, 2020

| Group                                       | Total | Deaths | Survivors | Survival | p value   |
|---------------------------------------------|-------|--------|-----------|----------|-----------|
| Children and adolescents                    | 5791  | 40     | 5751      | 99.31%   | -         |
| <b>Type of treatment</b>                    |       |        |           |          |           |
| No antiviral/antibiotic                     | 5336  | 28     | 5308      | 99.5%    | Reference |
| Antiviral only                              | 40    | 0      | 40        | 100.0%   | 0.7       |
| Antibiotic only                             | 376   | 10     | 366       | 97.3%    | <0.0001   |
| Antiviral + Antibiotic                      | 39    | 2      | 37        | 94.9%    | <0.0001   |
| <b>Type of antiviral or antibiotic only</b> |       |        |           |          |           |
| No antiviral/antibiotic                     | 5336  | 28     | 5308      | 99.5%    | Reference |
| Amantadine                                  | 9     | 0      | 9         | 100.0%   | 0.8       |
| Lopinavir-Ritonavir                         | 1     | 0      | 1         | 100.0%   | 0.9       |
| Oseltamivir                                 | 67    | 2      | 65        | 97.0%    | 0.008     |
| Rimantadine                                 | 2     | 0      | 2         | 100.0%   | 0.9       |
| Antibiotic only                             | 376   | 10     | 366       | 97.3%    | <0.0001   |
| <b>Treatment with oseltamivir</b>           |       |        |           |          |           |
| No antiviral/antibiotic                     | 5336  | 28     | 5308      | 99.5%    | Reference |
| Oseltamivir                                 | 36    | 0      | 36        | 100.0%   | 0.7       |
| Antibiotic only                             | 376   | 10     | 366       | 97.3%    | <0.0001   |
| Oseltamivir + Antibiotic                    | 31    | 2      | 29        | 93.5%    | <0.0001   |

Data expressed as number of patients or percentual of survival. p values were calculated by Log-Rank test.

**Supplementary Table 8:** Survival analysis of laboratory-confirmed COVID-19 pregnant women treated with antivirals and/or antibiotics in 177 accredited medical units in Mexico City, between February 24, 2020 and September 14, 2020

| Group                      | Total | Deaths | Survivors | Survival | p value   |
|----------------------------|-------|--------|-----------|----------|-----------|
| Pregnancy                  | 581   | 10     | 571       | 98.3%    | -         |
| Type of treatment          |       |        |           |          |           |
| No antiviral / Antibiotic  | 530   | 8      | 522       | 98.5%    | Reference |
| Antiviral only             | 12    | 1      | 11        | 91.7%    | 0.07      |
| Antibiotic only            | 35    | 0      | 35        | 100.0%   | 0.9       |
| Antiviral + Antibiotic     | 6     | 1      | 5         | 83.3%    | 0.004     |
| Type of antiviral          |       |        |           |          |           |
| No antiviral / Antibiotic  | 530   | 8      | 522       | 98.5%    | Reference |
| Amantadine                 | 2     | 0      | 2         | 100.0%   | 0.9       |
| Oseltamivir                | 16    | 2      | 14        | 87.5%    | 0.001     |
| Antibiotic only            | 35    | 0      | 35        | 100.0%   | 0.5       |
| Treatment with Oseltamivir |       |        |           |          |           |
| No antiviral / Antibiotic  | 530   | 8      | 522       | 98.5%    | Reference |
| Oseltamivir                | 11    | 1      | 10        | 90.9%    | 0.05      |
| Antibiotic only            | 35    | 0      | 35        | 100.0%   | 0.5       |
| Oseltamivir + Antibiotic   | 5     | 1      | 4         | 80.0%    | 0.001     |

Data expressed as number of patients or percentual of survival. p values were calculated by Log-Rank test.

**Supplementary Table 9:** Unadjusted mortality risk in laboratory-confirmed COVID-19 patients receiving antivirals, antibiotics, both, or none in accredited COVID-19 medical units in Mexico City

|                                     | All patients      |         | Ambulatory         |         | Hospitalized      |         | Non-Critical     |         | Critical          |         |
|-------------------------------------|-------------------|---------|--------------------|---------|-------------------|---------|------------------|---------|-------------------|---------|
|                                     | HR (95% CI)       | p       | HR (95% CI)        | p       | HR (95% CI)       | p       | HR (95% CI)      | p       | HR (95% CI)       | p       |
| <b>Models for type of treatment</b> |                   |         |                    |         |                   |         |                  |         |                   |         |
| No antiviral / antibiotic           | Reference         |         | Reference          |         | Reference         |         | Reference        |         | Reference         |         |
| Antiviral only                      | 4.43 (4.15-4.72)  | <0.0001 | 7.48 (6.29-8.90)   | <0.0001 | 1.19 (1.11-1.27)  | <0.0001 | 5.07 (4.67-5.52) | <0.0001 | 1.21 (1.09-1.34)  | <0.0001 |
| Antibiotic only                     | 2.15 (2.05-2.27)  | <0.0001 | 1.09 (0.88-1.36)   | 0.4     | 0.79 (0.75-0.83)  | <0.0001 | 1.89 (1.75-2.03) | <0.0001 | 0.63 (0.58-0.67)  | <0.0001 |
| Antiviral + antibiotic              | 4.31 (4.05-4.58)  | <0.0001 | 4.02 (3.09-5.22)   | <0.0001 | 0.90 (0.85-0.96)  | 0.001   | 4.65 (4.29-5.05) | <0.0001 | 0.96 (0.88-1.05)  | 0.4     |
| <b>Models for type of antiviral</b> |                   |         |                    |         |                   |         |                  |         |                   |         |
| No antiviral / antibiotic           | Reference         |         | Reference          |         | Reference         |         | Reference        |         | Reference         |         |
| Acyclovir                           | 1.71 (0.64-4.56)  | 0.3     | Not estimable      |         | 1.68 (0.63-4.48)  | 0.3     | 1.51 (0.38-6.07) | 0.6     | 1.51 (0.38-6.03)  | 0.6     |
| Amantadine                          | 0.71 (0.43-1.17)  | 0.2     | 1.06 (0.34-3.29)   | 0.9     | 0.77 (0.44-1.36)  | 0.4     | 0.68 (0.34-1.36) | 0.3     | 0.85 (0.40-1.78)  | 0.7     |
| Lopinavir-Ritonavir                 | 3.90 (2.61-5.83)  | <0.0001 | 12.96 (1.83-92.15) | 0.01    | 0.57 (0.38-0.85)  | .006    | 2.69 (1.28-5.65) | 0.009   | 0.57 (0.36-0.90)  | 0.02    |
| Osetamivir                          | 4.57 (4.36-4.79)  | <0.0001 | 6.55 (5.63-7.63)   | <0.0001 | 1.01 (0.97-1.07)  | 0.6     | 5.12 (4.81-5.46) | <0.0001 | 1.07 (0.99-1.14)  | 0.08    |
| Rimantadine                         | 1.74 (0.84-3.68)  | 0.1     | 2.02 (0.28-14.36)  | 0.5     | 1.19 (0.54-2.65)  | 0.7     | 1.83 (0.69-4.89) | 0.2     | 1.77 (0.57-5.48)  | 0.3     |
| Zanamivir                           | 3.22 (1.61-6.44)  | 0.001   | 5.24 (0.73-37.23)  | 0.09    | 0.76 (0.36-1.60)  | 0.5     | 2.34 (0.76-7.27) | 0.1     | 1.18 (0.49-2.85)  | 0.7     |
| Antibiotic only                     | 2.15 (2.05-2.27)  | <0.0001 | 1.09 (0.88-1.36)   | 0.4     | 0.79 (0.75-0.83)  | <0.0001 | 1.89 (1.75-2.03) | <0.0001 | 0.63 (0.59-0.67)  | <0.0001 |
| <b>Models for Acyclovir</b>         |                   |         |                    |         |                   |         |                  |         |                   |         |
| No antiviral / antibiotic           | Reference         |         | Reference          |         | Reference         |         | Reference        |         | Reference         |         |
| Acyclovir only                      | 2.16 (0.30-15.31) | 0.4     | Not estimable      |         | 4.09 (0.58-29.05) | 0.2     | Not estimable    |         | 2.21 (0.31-15.68) | 0.4     |
| Antibiotic only                     | 2.15 (2.05-2.27)  | <0.0001 | 1.09 (0.88-1.36)   | 0.4     | 0.78 (0.75-0.83)  | <0.0001 | 1.89 (1.75-2.03) | <0.0001 | 0.63 (0.58-0.67)  | <0.0001 |
| Acyclovir + antibiotic              | 1.60 (0.52-4.97)  | 0.4     | Not estimable      |         | 1.41 (0.45-4.37)  | 0.6     | 1.85 (0.46-7.38) | 0.4     | 1.16 (0.16-8.24)  | 0.9     |
| <b>Models for Amantadine</b>        |                   |         |                    |         |                   |         |                  |         |                   |         |
| No antiviral / antibiotic           | Reference         |         | Reference          |         | Reference         |         | Reference        |         | Reference         |         |
| Amantadine only                     | 1.17 (0.68-2.02)  | 0.6     | 1.34 (0.34-5.38)   | 0.7     | 1.47 (0.82-2.66)  | 0.2     | 1.15 (0.55-2.42) | 0.7     | 1.12 (0.50-2.50)  | 0.8     |
| Antibiotic only                     | 2.23 (2.12-2.34)  | <0.0001 | 1.09 (0.88-1.36)   | 0.4     | 0.79 (0.75-0.83)  | <0.0001 | 1.89 (1.75-2.03) | <0.0001 | 0.63 (0.58-0.67)  | <0.0001 |
| Amantadine + antibiotic             | 0.19 (0.05-0.80)  | 0.02    | 0.74 (0.10-5.27)   | 0.8     | 0.13 (0.09-0.88)  | 0.04    | 0.18 (0.03-1.25) | 0.08    | 0.34 (0.05-2.44)  | 0.3     |

|                                       | All patients     |         | Ambulatory          |         | Hospitalized     |         | Non-Critical      |         | Critical         |         |
|---------------------------------------|------------------|---------|---------------------|---------|------------------|---------|-------------------|---------|------------------|---------|
|                                       | HR (95% CI)      | p       | HR (95% CI)         | p       | HR (95% CI)      | p       | HR (95% CI)       | p       | HR (95% CI)      | p       |
| <b>Models for Lopinavir-Ritonavir</b> |                  |         |                     |         |                  |         |                   |         |                  |         |
| No antiviral / antibiotic             | Reference        |         | Reference           |         | Reference        |         | Reference         |         | Reference        |         |
| Lopinavir-Ritonavir only              | 2.79 (1.05-7.44) | 0.04    | 424.97 (59.62-3029) | <0.0001 | 0.38 (0.14-1.00) | 0.05    | 1.91 (0.27-13.63) | 0.5     | 0.36 (0.14-0.96) | 0.04    |
| Antibiotic only                       | 2.15 (2.05-2.27) | <0.0001 | 1.09 (0.88-1.36)    | 0.4     | 0.79 (0.75-0.83) | <0.0001 | 1.89 (1.75-2.03)  | <0.0001 | 0.63 (0.58-0.67) | <0.0001 |
| Lopinavir-Ritonavir + antibiotic      | 4.24 (2.73-6.58) | <0.0001 | Not estimable       |         | 0.64 (0.41-0.99) | 0.04    | 2.88 (1.29-6.42)  | 0.01    | 0.67 (0.39-1.14) | 0.1     |
| <b>Models for Oseltamivir</b>         |                  |         |                     |         |                  |         |                   |         |                  |         |
| No antiviral / antibiotic             | Reference        |         | Reference           |         | Reference        |         | Reference         |         | Reference        |         |
| Oseltamivir only                      | 4.62 (4.33-4.94) | <0.0001 | 8.00 (6.71-9.54)    | <0.0001 | 1.20 (1.12-1.29) | <0.0001 | 5.36 (4.92-5.83)  | <0.0001 | 1.24 (1.12-1.37) | <0.0001 |
| Antibiotic only                       | 2.15 (2.05-2.27) | <0.0001 | 1.09 (0.88-1.36)    | 0.4     | 0.79 (0.75-0.83) | <0.0001 | 1.89 (1.75-2.03)  | <0.0001 | 0.63 (0.59-0.67) | <0.0001 |
| Oseltamivir + antibiotic              | 4.53 (4.26-4.82) | <0.0001 | 4.56 (3.51-5.94)    | <0.0001 | 0.91 (0.86-0.97) | 0.003   | 4.92 (4.54-5.35)  | <0.0001 | 0.97 (0.89-1.06) | 0.5     |
| <b>Models for Rimantadine</b>         |                  |         |                     |         |                  |         |                   |         |                  |         |
| No antiviral / antibiotic             | Reference        |         | Reference           |         | Reference        |         | Reference         |         | Reference        |         |
| Rimantadine only                      | 2.75 (1.24-6.12) | 0.01    | 4.09 (0.58-29.09)   | 0.2     | 1.21 (0.50-2.90) | 0.7     | 2.54 (0.82-7.88)  | 0.1     | 1.79 (0.58-5.55) | 0.3     |
| Antibiotic only                       | 2.15 (2.05-2.27) | <0.0001 | 1.09 (0.88-1.36)    | 0.4     | 0.78 (0.75-0.83) | <0.0001 | 1.88 (1.75-2.03)  | <0.0001 | 0.63 (0.58-0.67) | <0.0001 |
| Rimantadine + antibiotic              | 0.55 (0.08-3.91) | 0.6     | Not estimable       |         | 1.14 (0.16-8.06) | 0.9     | 0.99 (0.14-7.08)  | 0.9     | -                | -       |
| <b>Models for Zanamivir</b>           |                  |         |                     |         |                  |         |                   |         |                  |         |
| No antiviral / antibiotic             | Reference        |         | Reference           |         | Reference        |         | Reference         |         | Reference        |         |
| Zanamivir only                        | 3.91 (1.75-8.69) | 0.001   | 10.31 (1.45-73.28)  | 0.02    | 0.78 (0.33-1.88) | 0.6     | 1.40 (0.19-9.96)  | 0.7     | 1.19 (0.49-2.86) | 0.7     |
| Antibiotic only                       | 2.15 (2.05-2.28) | <0.0001 | 1.09 (0.88-1.36)    | 0.4     | 0.79 (0.75-0.83) | <0.0001 | 1.89 (1.75-2.03)  | <0.0001 | 0.63 (0.49-2.86) | <0.0001 |
| Zanamivir + antibiotic                | 2.11 (0.53-8.43) | 0.3     | Not estimable       |         | 0.72 (0.18-2.87) | 0.6     | 3.52 (0.88-14.10) | 0.07    | -                | -       |

HR: Hazard ratio, 95%CI: 95% confidence intervals

**Supplementary Table 10:** Mortality risk in laboratory-confirmed COVID-19 patients who underwent invasive mechanical ventilation (IMV) and were treated with antivirals and/or antibiotics in one of 197 accredited hospitals in Mexico City, between February 24, 2020 and September 14, 2020

|                                  | Unadjusted model |         | Adjusted model <sup>a</sup> |         |
|----------------------------------|------------------|---------|-----------------------------|---------|
|                                  | HR (95% CI)      | p value | HR (95% CI)                 | p value |
| <b>Type of treatment</b>         |                  |         |                             |         |
| No antiviral/antibiotic          | Reference        |         | Reference                   |         |
| Antiviral only                   | 1.18 (1.07-1.31) | 0.001   | 1.13 (1.02-1.25)            | 0.02    |
| Antibiotic only                  | 0.62 (0.59-0.67) | <0.0001 | 0.64 (0.60-0.69)            | <0.0001 |
| Antiviral + antibiotic           | 0.95 (0.88-1.04) | 0.3     | 0.98 (0.90-1.07)            | 0.7     |
| <b>Type of antiviral</b>         |                  |         |                             |         |
| No antiviral/antibiotic          | Reference        |         | Reference                   |         |
| Acyclovir                        | 1.42 (0.36-5.68) | 0.6     | 1.96 (0.49-7.83)            | 0.3     |
| Amantadine                       | 1.29 (0.61-2.70) | 0.5     | 1.29 (0.61-2.72)            | 0.5     |
| Lopinavir-Ritonavir              | 0.67 (0.41-1.09) | 0.1     | 0.68 (0.42-1.12)            | 0.1     |
| Oseltamivir                      | 1.04 (0.97-1.12) | 0.3     | 1.04 (0.97-1.12)            | 0.2     |
| Rimantadine                      | 1.66 (0.53-5.14) | 0.4     | 1.57 (0.50-4.90)            | 0.4     |
| Zanamivir                        | 1.09 (0.48-2.64) | 0.8     | 0.87 (0.36-2.09)            | 0.8     |
| Antibiotic only                  | 0.63 (0.59-0.67) | <0.0001 | 0.64 (0.60-0.69)            | <0.0001 |
| <b>Acyclovir</b>                 |                  |         |                             |         |
| No antiviral/antibiotic          | Reference        |         | Reference                   |         |
| Acyclovir only                   | 2.09 (0.29-14.9) | 0.5     | 2.85 (0.40-20.35)           | 0.3     |
| Antibiotic only                  | 0.63 (0.58-0.67) | <0.0001 | 0.64 (0.60-0.69)            | <0.0001 |
| Acyclovir + antibiotic           | 1.09 (0.15-7.74) | 0.9     | 1.52 (0.21-10.78)           | 0.7     |
| <b>Amantadine</b>                |                  |         |                             |         |
| No antiviral/antibiotic          | Reference        |         | Reference                   |         |
| Amantadine only                  | 1.51 (0.68-3.35) | 0.3     | 1.50 (0.67-3.35)            | 0.32    |
| Antibiotic only                  | 0.63 (0.58-0.67) | <0.0001 | 0.64 (0.6-0.69)             | <0.0001 |
| Amantadine + antibiotic          | 0.71 (0.09-5.01) | 0.7     | 0.71 (0.10-5.09)            | 0.7     |
| <b>Lopinavir-Ritonavir</b>       |                  |         |                             |         |
| No antiviral/antibiotic          | Reference        |         | Reference                   |         |
| Lopinavir-Ritonavir only         | 0.59 (0.19-1.86) | 0.4     | 0.53 (0.17-1.63)            | 0.3     |
| Antibiotic only                  | 0.63 (0.58-0.67) | <0.0001 | 0.64 (0.60-0.69)            | <0.0001 |
| Lopinavir-Ritonavir + antibiotic | 0.68 (0.39-1.17) | 0.2     | 0.74 (0.43-1.27)            | 0.3     |
| <b>Oseltamivir</b>               |                  |         |                             |         |
| No antiviral/antibiotic          | Reference        |         | Reference                   |         |
| Oseltamivir only                 | 1.19 (1.07-1.31) | 0.001   | 1.14 (1.02-1.26)            | 0.02    |
| Antibiotic only                  | 0.63 (0.59-0.67) | <0.0001 | 0.64 (0.60-0.69)            | <0.0001 |
| Oseltamivir + antibiotic         | 0.96 (0.88-1.05) | 0.4     | 0.99 (0.91-1.08)            | 0.8     |
| <b>Rimantadine</b>               |                  |         |                             |         |
| No antiviral/antibiotic          | Reference        |         | Reference                   |         |
| Rimantadine only                 | 1.68 (0.54-5.20) | 0.4     | 1.66 (0.53-5.17)            | 0.4     |
| Antibiotic only                  | 0.63 (0.58-0.67) | <0.0001 | 0.64 (0.60-0.69)            | <0.0001 |
| <b>Zanamivir</b>                 |                  |         |                             |         |
| No antiviral/antibiotic          | Reference        |         | Reference                   |         |
| Zanamivir only                   | 1.10 (0.46-2.66) | 0.8     | 0.87 (0.36-2.10)            | .80     |
| Antibiotic only                  | 0.63 (0.58-0.67) | <0.0001 | 0.64 (0.60-0.69)            | <0.0001 |

HR: Hazard ratio, 95% CI: 95% confident interval.

a: Models adjusted by: Sex (men), Age, Diabetes, Chronic obstructive pulmonary disease, Immunosuppression, Hypertension, Cardiovascular disease, Chronic kidney disease, Smoker, Unemployed, Irritability, Headache, Myalgias, Arthralgias, Rhinorrhea, Abdominal pain, Cyanosis



**Supplementary Table 11:** Mortality risk in laboratory-confirmed COVID-19 patients who were treated with antivirals and/or antibiotics and admitted to one of 125 accredited intensive care units (ICU) in Mexico City, between February 24, 2020 and September 14, 2020

|                                  | Unadjusted model |         | Adjusted model <sup>a</sup> |         |
|----------------------------------|------------------|---------|-----------------------------|---------|
|                                  | HR (95% CI)      | p value | HR (95% CI)                 | p value |
| <b>Type of treatment</b>         |                  |         |                             |         |
| No antiviral/antibiotic          | Reference        |         | Reference                   |         |
| Antiviral only                   | 1.60 (1.21-2.13) | 0.001   | 1.42 (1.07-1.89)            | 0.02    |
| Antibiotic only                  | 1.15 (1.02-1.29) | 0.02    | 1.05 (0.93-1.19)            | 0.4     |
| Antiviral + antibiotic           | 1.71 (1.49-1.97) | <0.0001 | 1.49 (1.30-1.72)            | <0.0001 |
| <b>Type of antiviral</b>         |                  |         |                             |         |
| No antiviral/antibiotic          | Reference        |         | Reference                   |         |
| Acyclovir                        | 5.33 (0.75-37.9) | 0.09    | 8.38 (1.16-60.62)           | 0.04    |
| Amantadine                       | Not estimable    |         | Not estimable               |         |
| Lopinavir-Ritonavir              | 1.21 (0.75-1.97) | 0.44    | 0.99 (0.61-1.61)            | 0.9     |
| Oseltamivir                      | 1.74 (1.52-1.96) | <0.0001 | 1.52 (1.33-1.74)            | <0.0001 |
| Antibiotic only                  | 1.15 (1.02-1.29) | 0.02    | 1.05 (0.93-1.18)            | 0.4     |
| <b>Acyclovir</b>                 |                  |         |                             |         |
| No antiviral/antibiotic          | Reference        |         | Reference                   |         |
| Acyclovir only                   | 5.46 (0.77-38.9) | 0.09    | 10.21 (1.40-74.38)          | 0.02    |
| Antibiotic only                  | 1.15 (1.02-1.29) | 0.02    | 1.05 (0.93-1.18)            | 0.4     |
| <b>Amantadine</b>                |                  |         |                             |         |
| No antiviral/antibiotic          | Reference        |         | Reference                   |         |
| Amantadine only                  | Not estimable    |         | Not estimable               |         |
| Antibiotic only                  | 1.15 (1.02-1.29) | 0.02    | 1.05 (0.93-1.18)            | 0.4     |
| Amantadine + antibiotic          | Not estimable    |         | Not estimable               |         |
| <b>Lopinavir-Ritonavir</b>       |                  |         |                             |         |
| No antiviral/antibiotic          | Reference        |         | Reference                   |         |
| Lopinavir-Ritonavir only         | 0.74 (0.28-1.98) | 0.6     | 0.50 (0.19-1.35)            | 0.2     |
| Antibiotic only                  | 1.15 (1.02-1.29) | 0.02    | 1.05 (0.93-1.18)            | 0.5     |
| Lopinavir-Ritonavir + antibiotic | 1.50 (0.89-2.61) | 0.2     | 1.32 (0.76-2.29)            | 0.3     |
| <b>Oseltamivir</b>               |                  |         |                             |         |
| No antiviral/antibiotic          | Reference        |         | Reference                   |         |
| Oseltamivir only                 | 1.79 (1.34-2.42) | <0.0001 | 1.64 (1.22-2.21)            | <0.0001 |
| Antibiotic only                  | 1.15 (1.02-1.29) | 0.02    | 1.05 (0.93-1.19)            | 0.4     |
| Oseltamivir + antibiotic         | 1.73 (1.51-1.99) | <0.0001 | 1.50 (1.30-1.73)            | <0.0001 |

HR: Hazard ratio, 95% CI: 95% confident interval.

a: Models adjusted by: Sex (men), Age, Diabetes, Chronic obstructive pulmonary disease, Hypertension, Obesity, Chronic kidney disease, Unemployed, Fever, Cough, Shortness of breath, Myalgias, Vomit, Cyanosis

**Supplementary Table 12:** Mortality risk in laboratory-confirmed COVID-19 non-pregnant/puerperal adults treated with antivirals and/or antibiotics in 379 accredited medical units in Mexico City, between February 24, 2020 and September 14, 2020

|                                  | Unadjusted model |         | Adjusted model <sup>a</sup> |         |
|----------------------------------|------------------|---------|-----------------------------|---------|
|                                  | HR (95% CI)      | p value | HR (95% CI)                 | p value |
| <b>Type of treatment</b>         |                  |         |                             |         |
| No antiviral/antibiotic          | Reference        |         | Reference                   |         |
| Antiviral only                   | 4.34 (4.07-4.62) | <0.0001 | 1.80 (1.68-1.92)            | <0.0001 |
| Antibiotic only                  | 2.18 (2.08-2.29) | <0.0001 | 1.19 (1.13-1.25)            | <0.0001 |
| Antiviral + antibiotic           | 4.31 (4.07-4.57) | <0.0001 | 1.64 (1.54-1.74)            | <0.0001 |
| <b>Type of antiviral</b>         |                  |         |                             |         |
| No antiviral/antibiotic          | Reference        |         | Reference                   |         |
| Acyclovir                        | 1.57 (0.59-4.18) | 0.4     | 1.40 (0.52-3.72)            | 0.5     |
| Amantadine                       | 0.69 (0.42-1.16) | 0.2     | 0.72 (0.43-1.20)            | 0.2     |
| Lopinavir-Ritonavir              | 3.88 (2.62-5.74) | <0.0001 | 1.14 (0.77-1.69)            | 0.5     |
| Oseltamivir                      | 4.52 (4.32-4.74) | <0.0001 | 1.73 (1.65-1.82)            | <0.0001 |
| Rimantadine                      | 1.75 (0.83-3.67) | 0.1     | 1.47 (0.70-3.08)            | 0.3     |
| Zanamivir                        | 3.04 (1.52-6.08) | 0.002   | 1.61 (0.81-3.22)            | 0.2     |
| Antibiotic only                  | 2.18 (2.08-2.29) | <0.0001 | 1.19 (1.13-1.25)            | <0.0001 |
| <b>Acyclovir</b>                 |                  |         |                             |         |
| No antiviral/antibiotic          | Reference        |         | Reference                   |         |
| Acyclovir only                   | 2.09 (0.29-14.8) | 0.5     | 7.50 (1.06-53.27)           | 0.04    |
| Antibiotic only                  | 2.18 (2.08-2.29) | <0.0001 | 1.16 (1.10-1.22)            | <0.0001 |
| Acyclovir + antibiotic           | 1.45 (0.46-4.48) | 0.5     | 1.11 (0.36-3.45)            | 0.9     |
| <b>Amantadine</b>                |                  |         |                             |         |
| No antiviral/antibiotic          | Reference        |         | Reference                   |         |
| Amantadine only                  | 1.15 (0.67-1.98) | 0.6     | 1.75 (1.02-3.02)            | 0.04    |
| Antibiotic only                  | 2.18 (2.08-2.29) | <0.0001 | 1.16 (1.10-1.22)            | <0.0001 |
| Amantadine + antibiotic          | 0.19 (0.05-0.78) | 0.02    | 0.15 (0.04-0.59)            | 0.007   |
| <b>Lopinavir-Ritonavir</b>       |                  |         |                             |         |
| No antiviral/antibiotic          | Reference        |         | Reference                   |         |
| Lopinavir-Ritonavir only         | 3.27 (1.36-7.88) | 0.008   | 0.83 (0.34-1.99)            | 0.7     |
| Antibiotic only                  | 2.18 (2.08-2.29) | <0.0001 | 1.16 (1.11-1.22)            | <0.0001 |
| Lopinavir-Ritonavir + antibiotic | 4.06 (2.62-6.29) | <0.0001 | 1.18 (0.76-1.83)            | 0.5     |
| <b>Oseltamivir</b>               |                  |         |                             |         |
| No antiviral/antibiotic          | Reference        |         | Reference                   |         |
| Oseltamivir only                 | 4.52 (4.24-4.83) | <0.0001 | 1.81 (1.69-1.93)            | <0.0001 |
| Antibiotic only                  | 2.18 (2.08-2.29) | <0.0001 | 1.19 (1.13-1.25)            | <0.0001 |
| Oseltamivir + antibiotic         | 4.52 (4.26-4.79) | <0.0001 | 1.68 (1.58-1.78)            | <0.0001 |
| <b>Rimantadine</b>               |                  |         |                             |         |
| No antiviral/antibiotic          | Reference        |         | Reference                   |         |
| Rimantadine only                 | 2.71 (1.22-6.03) | 0.02    | 2.02 (0.91-4.50)            | 0.1     |
| Antibiotic only                  | 2.18 (2.08-2.29) | <0.0001 | 1.16 (1.11-1.22)            | <0.0001 |
| Rimantadine + antibiotic         | 0.56 (0.08-3.97) | 0.6     | 0.53 (0.07-3.77)            | 0.5     |
| <b>Zanamivir</b>                 |                  |         |                             |         |
| No antiviral/antibiotic          | Reference        |         | Reference                   |         |
| Zanamivir only                   | 3.79 (1.71-8.45) | 0.001   | 2.02 (0.91-4.50)            | 0.1     |
| Antibiotic only                  | 2.18 (2.08-2.29) | <0.0001 | 1.16 (1.11-1.22)            | <0.0001 |
| Zanamivir + antibiotic           | 1.90 (0.48-7.62) | 0.36    | 0.97 (0.24-3.86)            | 0.9     |

HR: Hazard ratio, 95% CI: 95% confident interval.

a: Models adjusted by: Sex (men), Age, Diabetes, Chronic obstructive pulmonary disease, Immunosuppression, Hypertension, Human immunodeficiency virus/acquired immune deficiency syndrome, Obesity, Cardiovascular disease, Chronic kidney disease, Smoker, Unemployed, Fever, Cough, Shortness of breath, Irritability, Chest pain, Myalgias, Arthralgias, Polypnea, Vomit, Abdominal pain

**Supplementary Table 13:** Mortality risk in laboratory-confirmed COVID-19 children and adolescents treated with antivirals and/or antibiotics in 273 accredited medical units in Mexico City, between February 24, 2020 and September 14, 2020

|                          | Unadjusted model   |         | Adjusted model <sup>a</sup> |         |
|--------------------------|--------------------|---------|-----------------------------|---------|
|                          | HR (95% CI)        | p value | HR (95% CI)                 | p value |
| <b>Type of treatment</b> |                    |         |                             |         |
| No antiviral/antibiotic  | Reference          |         | Reference                   |         |
| Antiviral only           | Not estimable      |         | Not estimable               |         |
| Antibiotic only          | 5.01 (2.43-10.32)  | <0.0001 | 4.22 (2.01-8.86)            | <0.0001 |
| Antiviral + antibiotic   | 9.68 (2.31-40.62)  | 0.002   | 6.54 (1.44-29.63)           | 0.01    |
| <b>Type of antiviral</b> |                    |         |                             |         |
| No antiviral/antibiotic  | Reference          |         | Reference                   |         |
| Amantadine               | Not estimable      |         | Not estimable               |         |
| Lopinavir-Ritonavir      | Not estimable      |         | Not estimable               |         |
| Oseltamivir              | 5.66 (1.35-23.73)  | 0.02    | 4.22 (0.94-18.99)           | 0.06    |
| Rimantadine              | Not estimable      |         | Not estimable               |         |
| Antibiotic only          | 5.01 (2.43-10.31)  | <0.0001 | 4.20 (2.00-8.83)            | <0.0001 |
| <b>Oseltamivir</b>       |                    |         |                             |         |
| No antiviral/antibiotic  | Reference          |         | Reference                   |         |
| Oseltamivir only         | Not estimable      |         | Not estimable               |         |
| Antibiotic only          | 5.01 (2.43-10.3)   | <0.0001 | 4.20 (2.00-8.82)            | <0.0001 |
| Oseltamivir + antibiotic | 12.10 (2.89-50.84) | 0.001   | 7.95 (1.70-37.21)           | 0.01    |

HR: Hazard ratio, 95% CI: 95% confident interval.

a: Models adjusted by: Diabetes, Immunosuppression, Chronic kidney disease

**Supplementary Table 14:** Mortality risk in laboratory-confirmed COVID-19 pregnant women treated with antivirals and/or antibiotics in 117 accredited medical units in Mexico City, between February 24, 2020 and September 14, 2020

|                          | Non-adjusted model  |         |
|--------------------------|---------------------|---------|
|                          | HR (95% CI)         | P value |
| <b>Type of treatment</b> |                     |         |
| No antiviral/antibiotic  | Reference           |         |
| Antiviral only           | 5.51 (0.69-44.06)   | 0.1     |
| Antibiotic only          | Not estimable       |         |
| Antiviral + antibiotic   | 11.14 (1.39-89.07)  | 0.02    |
| <b>Type of antiviral</b> |                     |         |
| No antiviral/antibiotic  | Reference           |         |
| Amantadine               | Not estimable       |         |
| Oseltamivir              | 8.35 (1.77-39.30)   | 0.007   |
| Antibiotic only          | Not estimable       |         |
| <b>Oseltamivir</b>       |                     |         |
| No antiviral/antibiotic  | Reference           |         |
| Oseltamivir only         | 6.04 (0.76-48.26)   | 0.09    |
| Antibiotic only          | Not estimable       |         |
| Oseltamivir + antibiotic | 13.52 (1.69-108.10) | 0.01    |

HR: Hazard ratio, 95% CI: 95% confident interval

**Supplementary Table 15:** E-Values for Cox regression models in the general population, ambulatory, hospitalized, non-critical, and critical COVID-19 patients

|                                       | All patients | Ambulatory  | Hospitalized | Non-Critical | Critical    |
|---------------------------------------|--------------|-------------|--------------|--------------|-------------|
| <b>Models for type of treatment</b>   |              |             |              |              |             |
| Antiviral only                        | 2.83 (2.60)  | 8.87 (7.34) | -            | 3.48 (3.12)  | -           |
| antibiotic only                       | 1.51 (1.37)  | 2.12 (1.5)  | 1.77 (1.60)  | -            | 2.35 (2.12) |
| Antiviral + antibiotic                | 2.52 (2.30)  | 3.23 (2.3)  | 1.43 (1.21)  | 2.64 (2.34)  | -           |
| <b>Models for type of antiviral</b>   |              |             |              |              |             |
| Acyclovir                             | -            | -           | 4.94 (1.21)  | -            | -           |
| Amantadine                            | -            | -           | -            | -            | -           |
| Lopinavir-Ritonavir                   | -            | -           | 2.78 (1.5)   | -            | -           |
| Oseltamivir                           | 2.71 (2.54)  | 6.50 (5.47) | -            | 3.08 (2.83)  | -           |
| Rimantadine                           | -            | -           | -            | -            | -           |
| Zanamivir                             | -            | -           | -            | -            | -           |
| Antibiotic only                       | 1.54 (1.37)  | 2.12 (1.46) | 1.77 (1.60)  | -            | 2.30 (2.12) |
| <b>Models for Acyclovir</b>           |              |             |              |              |             |
| Acyclovir only                        | 15.68 (1.54) | -           | 17.45 (1.83) | -            | -           |
| Antibiotic only                       | 1.46 (1.28)  | 2.17 (1.5)  | 1.74 (1.60)  | -            | 2.35 (2.12) |
| Acyclovir + antibiotic                | -            | -           | -            | -            | -           |
| <b>Models for Amantadine</b>          |              |             |              |              |             |
| Amantadine only                       | 2.96 (1.21)  | -           | -            | -            | -           |
| Antibiotic only                       | 1.46 (1.28)  | 2.17 (1.50) | 1.74 (1.60)  | -            | 2.35 (2.12) |
| Amantadine + antibiotic               | 12.81 (2.78) | -           | -            | 14.87 (1.46) | -           |
| <b>Models for Lopinavir-Ritonavir</b> |              |             |              |              |             |
| Lopinavir-Ritonavir only              | -            | 113 (15.22) | -            | -            | -           |
| Antibiotic only                       | 1.46 (1.28)  | 2.17 (1.50) | 1.74 (1.60)  | -            | 2.35 (2.12) |
| Lopinavir-Ritonavir + antibiotic      | -            | -           | -            | -            | -           |
| <b>Models for Oseltamivir</b>         |              |             |              |              |             |
| Oseltamivir only                      | 2.83 (2.60)  | 9.05 (7.48) | -            | 3.52 (3.17)  | -           |
| Antibiotic only                       | 1.51 (1.37)  | 2.12 (1.50) | 1.74 (1.60)  | -            | 2.35 (2.12) |
| Oseltamivir + antibiotic              | 2.60 (2.39)  | 3.62 (2.69) | 1.39 (1.16)  | 2.75 (2.47)  | -           |
| <b>Models for Rimantadine</b>         |              |             |              |              |             |
| Rimantadine only                      | -            | -           | -            | -            | -           |
| Antibiotic only                       | 1.46 (1.28)  | 2.17 (1.50) | 1.74 (1.60)  | -            | 2.35 (2.12) |
| Rimantadine + antibiotic              | -            | -           | -            | -            | -           |
| <b>Models for Zanamivir</b>           |              |             |              |              |             |
| Zanamivir only                        | -            | -           | -            | -            | -           |
| Antibiotic only                       | 1.46 (1.28)  | 2.17 (1.50) | 1.74 (1.60)  | -            | 2.35 (2.12) |
| Zanamivir + antibiotic                | -            | -           | -            | -            | -           |

Data presented as E-value for point estimate (E-value for lower-limit confidence interval)

**Supplementary Table 16:** E-Values for Cox regression models in non-pregnant/puerperal adults, children and adolescents, VMI, and ICU patients

|                                       | IMV         | ICU          | Non-pregnant/<br>puerperal adults | Children and<br>adolescents |
|---------------------------------------|-------------|--------------|-----------------------------------|-----------------------------|
| <b>Models for type of treatment</b>   |             |              |                                   |                             |
| Antiviral only                        | 1.51 (1.16) | 2.19 (1.34)  | 3.00 (2.75)                       | -                           |
| Antibiotic only                       | 2.50 (2.26) | -            | 1.67 (1.51)                       | 7.91 (3.43)                 |
| Antiviral + antibiotic                | -           | 2.34 (1.92)  | 2.66 (2.45)                       | 12.56 (2.24)                |
| <b>Models for type of antiviral</b>   |             |              |                                   |                             |
| Acyclovir                             | -           | 16.24 (1.59) | -                                 | -                           |
| Amantadine                            | -           | -            | -                                 | -                           |
| Lopinavir-Ritonavir                   | -           | -            | -                                 | -                           |
| Oseltamivir                           | -           | 2.41 (1.99)  | 2.85 (2.69)                       | -                           |
| Rimantadine                           | -           | -            | -                                 | -                           |
| Zanamivir                             | -           | -            | -                                 | -                           |
| Antibiotic only                       | 2.50 (2.26) | -            | 1.67 (1.51)                       | 7.87 (3.41)                 |
| <b>Models for Acyclovir</b>           |             |              |                                   |                             |
| Acyclovir only                        | -           | 19.91 (2.15) | 14.48 (1.31)                      | -                           |
| Antibiotic only                       | 2.50 (2.26) | -            | 1.59 (1.43)                       | -                           |
| Acyclovir +<br>antibiotic             | -           | -            | -                                 | -                           |
| <b>Models for Amantadine</b>          |             |              |                                   |                             |
| Amantadine only                       | -           | -            | 2.9 (1.16)                        | -                           |
| Antibiotic only                       | 2.50 (2.26) | -            | 1.59 (1.43)                       | -                           |
| Amantadine +<br>antibiotic            | -           | -            | -                                 | -                           |
| <b>Models for Lopinavir-Ritonavir</b> |             |              |                                   |                             |
| Lopinavir-Ritonavir<br>only           | -           | -            | -                                 | -                           |
| Antibiotic only                       | 2.50 (2.26) | -            | 1.59 (1.43)                       | -                           |
| Lopinavir-Ritonavir<br>+ antibiotic   | -           | -            | -                                 | -                           |
| <b>Models for Oseltamivir</b>         |             |              |                                   |                             |
| Oseltamivir only                      | 1.54 (1.16) | 2.66 (1.74)  | 3.02 (2.77)                       | -                           |
| Antibiotic only                       | 2.50 (2.26) | -            | 1.67 (1.51)                       | 7.87 (3.41)                 |
| Oseltamivir +<br>antibiotic           | -           | 2.37 (1.92)  | 2.75 (2.54)                       | 15.38 (2.79)                |

Data presented as E-value for point estimate (E-value for lower-limit confidence interval)

**Supplementary Table 17:** Baseline characteristics of patients with COVID-19 treated with antivirals and propensity score-matched controls not treated with antivirals or antibiotics

|                                              | Total<br>n=8088 | Antiviral<br>n=4044 | Control<br>n=4044 |
|----------------------------------------------|-----------------|---------------------|-------------------|
| <b>Sex</b>                                   |                 |                     |                   |
| Women                                        | 3634 (44.9)     | 1821 (45.0)         | 1813 (44.8)       |
| Men                                          | 4454 (55.1)     | 2223 (55.0)         | 2231 (55.2)       |
| Age, mean (SD)                               | 50.5 (16.5)     | 50.5 (16.5)         | 50.5 (16.5)       |
| <b>Age categories</b>                        |                 |                     |                   |
| 0-19 years                                   | 114 (1.4)       | 57 (1.4)            | 57 (1.4)          |
| 20-29 years                                  | 747 (9.2)       | 372 (9.2)           | 375 (9.3)         |
| 30-39 years                                  | 1411 (17.4)     | 704 (17.4)          | 707 (17.5)        |
| 40-49 years                                  | 1667 (20.6)     | 830 (20.5)          | 837 (20.7)        |
| 50-59 years                                  | 1724 (21.3)     | 872 (21.6)          | 852 (21.1)        |
| 60-69 years                                  | 1264 (15.6)     | 632 (15.6)          | 632 (15.6)        |
| 70-79 years                                  | 821 (10.2)      | 403 (10.0)          | 418 (10.3)        |
| 80-89 years                                  | 302 (3.7)       | 156 (3.9)           | 146 (3.6)         |
| 90-99 years                                  | 38 (0.5)        | 18 (0.4)            | 20 (0.5)          |
| ≥100 years                                   | 0 (0.0)         | 0 (0.0)             | 0 (0.0)           |
| Indigenous self-identification               | 58 (0.7)        | 21 (0.5)            | 37 (0.9)          |
| <b>Occupation</b>                            |                 |                     |                   |
| Technical services                           | 133 (1.6)       | 63 (1.6)            | 70 (1.7)          |
| Education                                    | 236 (2.9)       | 131 (3.2)           | 105 (2.6)         |
| Healthcare                                   | 1114 (13.8)     | 459 (11.4)          | 655 (16.2)        |
| Agricultural activities                      | 15 (0.2)        | 10 (0.2)            | 5 (0.1)           |
| Commerce                                     | 2532 (31.3)     | 1454 (36.0)         | 1078 (26.7)       |
| Other                                        | 1618 (20.0)     | 707 (17.5)          | 911 (22.5)        |
| Unemployed                                   | 483 (6.0)       | 206 (5.1)           | 277 (6.8)         |
| Stay-at-home                                 | 1957 (24.2)     | 1014 (25.1)         | 943 (23.3)        |
| Last-season flu vaccination                  | 1396 (17.3)     | 701 (17.3)          | 695 (17.2)        |
| <b>Comorbidities</b>                         |                 |                     |                   |
| Diabetes                                     | 1783 (22.0)     | 873 (21.6)          | 910 (22.5)        |
| COPD                                         | 239 (3.0)       | 120 (3.0)           | 119 (2.9)         |
| Asthma                                       | 181 (2.2)       | 85 (2.1)            | 96 (2.4)          |
| Immunosuppression                            | 145 (1.8)       | 61 (1.5)            | 84 (2.1)          |
| Hypertension                                 | 2144 (26.5)     | 1070 (26.5)         | 1074 (26.6)       |
| HIV/AIDS                                     | 56 (0.7)        | 26 (0.6)            | 30 (0.7)          |
| Cardiovascular disease                       | 276 (3.4)       | 123 (3.0)           | 153 (3.8)         |
| Obesity                                      | 1716 (21.2)     | 879 (21.7)          | 837 (20.7)        |
| Chronic kidney disease                       | 266 (3.3)       | 116 (2.9)           | 150 (3.7)         |
| Smoker                                       | 924 (11.4)      | 463 (11.4)          | 461 (11.4)        |
| <b>Type of medical attention</b>             |                 |                     |                   |
| Ambulatory                                   | 4794 (59.3)     | 2782 (68.8)         | 2012 (49.8)       |
| Hospitalization                              | 3294 (40.7)     | 1262 (31.2)         | 2032 (50.2)       |
| <b>Severity of the disease</b>               |                 |                     |                   |
| Non-critical                                 | 7232 (89.4)     | 3714 (91.8)         | 3518 (87.0)       |
| Critical                                     | 856 (10.6)      | 330 (8.2)           | 526 (13.0)        |
| Time from symptom onset to medical attention | 4.7 (3.9)       | 4.5 (3.9)           | 4.9 (3.9)         |

|                          | Total<br>n=8088 | Antiviral<br>n=4044 | Control<br>n=4044 |
|--------------------------|-----------------|---------------------|-------------------|
| <b>Baseline symptoms</b> |                 |                     |                   |
| Fever                    | 6706 (82.9)     | 3374 (83.4)         | 3332 (82.4)       |
| Cough                    | 6646 (82.2)     | 3240 (80.1)         | 3406 (84.2)       |
| Sore throat              | 3985 (49.3)     | 1971 (48.7)         | 2014 (49.8)       |
| Shortness of breath      | 4448 (55.0)     | 2214 (54.7)         | 2234 (55.2)       |
| Irritability             | 1947 (24.1)     | 868 (21.5)          | 1079 (26.7)       |
| Diarrhea                 | 2292 (28.3)     | 1140 (28.2)         | 1152 (28.5)       |
| Chest pain               | 3122 (38.6)     | 1460 (36.1)         | 1662 (41.1)       |
| Chills                   | 4006 (49.5)     | 1868 (46.2)         | 2138 (52.9)       |
| Headache                 | 6422 (79.4)     | 3138 (77.6)         | 3284 (81.2)       |
| Myalgias                 | 5306 (65.6)     | 2673 (66.1)         | 2633 (65.1)       |
| Arthralgias              | 4810 (59.5)     | 2433 (60.2)         | 2377 (58.8)       |
| Abrupt deterioration     | 4995 (61.8)     | 2291 (56.7)         | 2704 (66.9)       |
| Rhinorrhea               | 2599 (32.1)     | 1249 (30.9)         | 1350 (33.4)       |
| Polypnea                 | 1830 (22.6)     | 749 (18.5)          | 1081 (26.7)       |
| Vomit                    | 888 (11.0)      | 409 (10.1)          | 479 (11.8)        |
| Abdominal pain           | 1693 (20.9)     | 668 (16.5)          | 1025 (25.3)       |
| Conjunctivitis           | 1116 (13.8)     | 603 (14.9)          | 513 (12.7)        |
| Cyanosis                 | 719 (8.9)       | 256 (6.3)           | 463 (11.4)        |
| Sudden onset of symptoms | 3191 (39.5)     | 1574 (38.9)         | 1617 (40.0)       |

Data expressed as frequency (%) or mean (SD)

SD: Standard deviation, COPD: Chronic obstructive pulmonary disease, HIV/AIDS: Human immunodeficiency virus/acquired immune deficiency syndrome



**Supplementary Table 18:** Baseline characteristics of patients with COVID-19 treated with Oseltamivir and propensity score-matched controls not treated with antivirals or antibiotics

|                                              | Total<br>n=7574 | Oseltamivir<br>n=3787 | Control<br>n=3787 |
|----------------------------------------------|-----------------|-----------------------|-------------------|
| <b>Sex</b>                                   |                 |                       |                   |
| Women                                        | 3351 (44.2)     | 1676 (44.3)           | 1675 (44.2)       |
| Men                                          | 4223 (55.8)     | 2111 (55.7)           | 2112 (55.8)       |
| Age, mean (SD)                               | 50.8 (16.5)     | 50.8 (16.6)           | 50.7 (16.4)       |
| <b>Age categories</b>                        |                 |                       |                   |
| 0-19 years                                   | 98 (1.3)        | 47 (1.2)              | 51 (1.3)          |
| 20-29 years                                  | 698 (9.2)       | 349 (9.2)             | 349 (9.2)         |
| 30-39 years                                  | 1267 (16.7)     | 632 (16.7)            | 635 (16.8)        |
| 40-49 years                                  | 1569 (20.7)     | 788 (20.8)            | 781 (20.6)        |
| 50-59 years                                  | 1624 (21.4)     | 822 (21.7)            | 802 (21.2)        |
| 60-69 years                                  | 1213 (16.0)     | 607 (16.0)            | 606 (16.0)        |
| 70-79 years                                  | 785 (10.4)      | 386 (10.2)            | 399 (10.5)        |
| 80-89 years                                  | 282 (3.7)       | 138 (3.6)             | 144 (3.8)         |
| 90-99 years                                  | 38 (0.5)        | 18 (0.5)              | 20 (0.5)          |
| ≥100 years                                   | 0 (0.0)         | 0 (0.0)               | 0 (0.0)           |
| Indigenous self-identification               | 51 (0.7)        | 17 (0.4)              | 34 (0.9)          |
| <b>Occupation</b>                            |                 |                       |                   |
| Technical services                           | 127 (1.7)       | 58 (1.5)              | 69 (1.8)          |
| Education                                    | 202 (2.7)       | 112 (3.0)             | 90 (2.4)          |
| Healthcare                                   | 1027 (13.6)     | 408 (10.8)            | 619 (16.3)        |
| Agricultural activities                      | 17 (0.2)        | 12 (0.3)              | 5 (0.1)           |
| Commerce                                     | 2388 (31.5)     | 1394 (36.8)           | 994 (26.2)        |
| Other                                        | 1484 (19.6)     | 626 (16.5)            | 858 (22.7)        |
| Unemployed                                   | 464 (6.1)       | 204 (5.4)             | 260 (6.9)         |
| Stay-at-home                                 | 1865 (24.6)     | 973 (25.7)            | 892 (23.6)        |
| Last-season flu vaccination                  | 1297 (17.1)     | 660 (17.4)            | 637 (16.8)        |
| <b>Comorbidities</b>                         |                 |                       |                   |
| Diabetes                                     | 1730 (22.8)     | 853 (22.5)            | 877 (23.2)        |
| COPD                                         | 219 (2.9)       | 102 (2.7)             | 117 (3.1)         |
| Asthma                                       | 177 (2.3)       | 88 (2.3)              | 89 (2.4)          |
| Immunosuppression                            | 142 (1.9)       | 61 (1.6)              | 81 (2.1)          |
| Hypertension                                 | 2070 (27.3)     | 1031 (27.2)           | 1039 (27.4)       |
| HIV/AIDS                                     | 47 (0.6)        | 17 (0.4)              | 30 (0.8)          |
| Cardiovascular disease                       | 263 (3.5)       | 114 (3.0)             | 149 (3.9)         |
| Obesity                                      | 1583 (20.9)     | 796 (21.0)            | 787 (20.8)        |
| Chronic kidney disease                       | 259 (3.4)       | 113 (3.0)             | 146 (3.9)         |
| Smoker                                       | 864 (11.4)      | 436 (11.5)            | 428 (11.3)        |
| <b>Type of medical attention</b>             |                 |                       |                   |
| Ambulatory                                   | 4412 (58.3)     | 2588 (68.3)           | 1824 (48.2)       |
| Hospitalization                              | 3162 (41.7)     | 1199 (31.7)           | 1963 (51.8)       |
| <b>Severity of the disease</b>               |                 |                       |                   |
| Non-critical                                 | 6760 (89.3)     | 3474 (91.7)           | 3286 (86.8)       |
| Critical                                     | 814 (10.7)      | 313 (8.3)             | 501 (13.2)        |
| Time from symptom onset to medical attention | 4.7 (3.9)       | 4.4 (3.9)             | 4.9 (4.0)         |

|                          | Total<br>n=7574 | Oseltamivir<br>n=3787 | Control<br>n=3787 |
|--------------------------|-----------------|-----------------------|-------------------|
| <b>Baseline symptoms</b> |                 |                       |                   |
| Fever                    | 6370 (84.1)     | 3204 (84.6)           | 3166 (83.6)       |
| Cough                    | 6220 (82.1)     | 3013 (79.6)           | 3207 (84.7)       |
| Sore throat              | 3719 (49.1)     | 1831 (48.3)           | 1888 (49.9)       |
| Shortness of breath      | 4286 (56.6)     | 2137 (56.4)           | 2149 (56.7)       |
| Irritability             | 1895 (25.0)     | 882 (23.3)            | 1013 (26.7)       |
| Diarrhea                 | 2127 (28.1)     | 1043 (27.5)           | 1084 (28.6)       |
| Chest pain               | 2975 (39.3)     | 1388 (36.7)           | 1587 (41.9)       |
| Chills                   | 3768 (49.7)     | 1758 (46.4)           | 2010 (53.1)       |
| Headache                 | 6046 (79.8)     | 2947 (77.8)           | 3099 (81.8)       |
| Myalgias                 | 4970 (65.6)     | 2508 (66.2)           | 2462 (65.0)       |
| Arthralgias              | 4506 (59.5)     | 2273 (60.0)           | 2233 (59.0)       |
| Abrupt deterioration     | 4746 (62.7)     | 2187 (57.8)           | 2559 (67.6)       |
| Rhinorrhea               | 2450 (32.3)     | 1198 (31.6)           | 1252 (33.1)       |
| Polypnea                 | 1834 (24.2)     | 790 (20.9)            | 1044 (27.6)       |
| Vomit                    | 853 (11.3)      | 395 (10.4)            | 458 (12.1)        |
| Abdominal pain           | 1585 (20.9)     | 608 (16.1)            | 977 (25.8)        |
| Conjunctivitis           | 1014 (13.4)     | 540 (14.3)            | 474 (12.5)        |
| Cyanosis                 | 745 (9.8)       | 291 (7.7)             | 454 (12.0)        |
| Sudden onset of symptoms | 3024 (39.9)     | 1494 (39.5)           | 1530 (40.4)       |

Data expressed as frequency (%) or mean (SD)

SD: Standard deviation, COPD: Chronic obstructive pulmonary disease, HIV/AIDS: Human immunodeficiency virus/acquired immune deficiency syndrome

**Supplementary Table 19:** Baseline characteristics of patients with COVID-19 treated with antibiotics and propensity score-matched controls not treated with antivirals or antibiotics

|                                              | Total<br>n=27486 | Antibiotic<br>n=13743 | Control<br>n=13743 |
|----------------------------------------------|------------------|-----------------------|--------------------|
| <b>Sex</b>                                   |                  |                       |                    |
| Women                                        | 11940 (43.4)     | 5940 (43.2)           | 6000 (43.7)        |
| Men                                          | 15546 (56.6)     | 7803 (56.8)           | 7743 (56.3)        |
| Age, mean (SD)                               | 48.2 (16.7)      | 48.3 (16.8)           | 48.1 (16.6)        |
| <b>Age categories</b>                        |                  |                       |                    |
| 0-19 years                                   | 928 (3.4)        | 445 (3.2)             | 483 (3.5)          |
| 20-29 years                                  | 2778 (10.1)      | 1399 (10.2)           | 1379 (10.0)        |
| 30-39 years                                  | 4912 (17.9)      | 2475 (18.0)           | 2437 (17.7)        |
| 40-49 years                                  | 5976 (21.7)      | 3010 (21.9)           | 2966 (21.6)        |
| 50-59 years                                  | 5830 (21.2)      | 2924 (21.3)           | 2906 (21.1)        |
| 60-69 years                                  | 4104 (14.9)      | 2056 (15.0)           | 2048 (14.9)        |
| 70-79 years                                  | 2097 (7.6)       | 1025 (7.5)            | 1072 (7.8)         |
| 80-89 years                                  | 744 (2.7)        | 355 (2.6)             | 389 (2.8)          |
| 90-99 years                                  | 111 (0.4)        | 52 (0.4)              | 59 (0.4)           |
| ≥100 years                                   | 6 (0.0)          | 2 (0.0)               | 4 (0.0)            |
| Indigenous self-identification               | 152 (0.6)        | 60 (0.4)              | 92 (0.7)           |
| <b>Occupation</b>                            |                  |                       |                    |
| Technical services                           | 466 (1.7)        | 229 (1.7)             | 237 (1.7)          |
| Education                                    | 1284 (4.7)       | 622 (4.5)             | 662 (4.8)          |
| Healthcare                                   | 2829 (10.3)      | 1555 (11.3)           | 1274 (9.3)         |
| Agricultural activities                      | 90 (0.3)         | 39 (0.3)              | 51 (0.4)           |
| Commerce                                     | 10282 (37.4)     | 5227 (38.0)           | 5055 (36.8)        |
| Other                                        | 4993 (18.2)      | 2394 (17.4)           | 2599 (18.9)        |
| Unemployed                                   | 1131 (4.1)       | 674 (4.9)             | 457 (3.3)          |
| Stay-at-home                                 | 6411 (23.3)      | 3003 (21.9)           | 3408 (24.8)        |
| Last-season flu vaccination                  | 5289 (19.2)      | 2538 (18.5)           | 2751 (20.0)        |
| <b>Comorbidities</b>                         |                  |                       |                    |
| Diabetes                                     | 5268 (19.2)      | 2591 (18.9)           | 2677 (19.5)        |
| COPD                                         | 480 (1.7)        | 232 (1.7)             | 248 (1.8)          |
| Asthma                                       | 622 (2.3)        | 334 (2.4)             | 288 (2.1)          |
| Immunosuppression                            | 406 (1.5)        | 171 (1.2)             | 235 (1.7)          |
| Hypertension                                 | 6049 (22.0)      | 2976 (21.7)           | 3073 (22.4)        |
| HIV/AIDS                                     | 120 (0.4)        | 58 (0.4)              | 62 (0.5)           |
| Cardiovascular disease                       | 659 (2.4)        | 289 (2.1)             | 370 (2.7)          |
| Obesity                                      | 6009 (21.9)      | 3026 (22.0)           | 2983 (21.7)        |
| Chronic kidney disease                       | 531 (1.9)        | 231 (1.7)             | 300 (2.2)          |
| Smoker                                       | 3115 (11.3)      | 1554 (11.3)           | 1561 (11.4)        |
| <b>Type of medical attention</b>             |                  |                       |                    |
| Ambulatory                                   | 18548 (67.5)     | 10280 (74.8)          | 8268 (60.2)        |
| Hospitalization                              | 8938 (32.5)      | 3463 (25.2)           | 5475 (39.8)        |
| <b>Severity of the disease</b>               |                  |                       |                    |
| Non-critical                                 | 24844 (90.4)     | 12826 (93.3)          | 12018 (87.4)       |
| Critical                                     | 2642 (9.6)       | 917 (6.7)             | 1725 (12.6)        |
| Time from symptom onset to medical attention | 5.1 (3.9)        | 5.5 (3.8)             | 4.8 (3.9)          |

|                          | Total<br>n=27486 | Antibiotic<br>n=13743 | Control<br>n=13743 |
|--------------------------|------------------|-----------------------|--------------------|
| <b>Baseline symptoms</b> |                  |                       |                    |
| Fever                    | 19681 (71.6)     | 9912 (72.1)           | 9769 (71.1)        |
| Cough                    | 20783 (75.6)     | 10412 (75.8)          | 10371 (75.5)       |
| Sore throat              | 12673 (46.1)     | 6432 (46.8)           | 6241 (45.4)        |
| Shortness of breath      | 12972 (47.2)     | 6471 (47.1)           | 6501 (47.3)        |
| Irritability             | 5405 (19.7)      | 2880 (21.0)           | 2525 (18.4)        |
| Diarrhea                 | 7083 (25.8)      | 3589 (26.1)           | 3494 (25.4)        |
| Chest pain               | 8782 (32.0)      | 4613 (33.6)           | 4169 (30.3)        |
| Chills                   | 10668 (38.8)     | 5665 (41.2)           | 5003 (36.4)        |
| Headache                 | 19521 (71.0)     | 10121 (73.6)          | 9400 (68.4)        |
| Myalgias                 | 16206 (59.0)     | 8161 (59.4)           | 8045 (58.5)        |
| Arthralgias              | 14959 (54.4)     | 7530 (54.8)           | 7429 (54.1)        |
| Abrupt deterioration     | 14853 (54.0)     | 7071 (51.5)           | 7782 (56.6)        |
| Rhinorrhea               | 7814 (28.4)      | 4126 (30.0)           | 3688 (26.8)        |
| Polypnea                 | 4169 (15.2)      | 2200 (16.0)           | 1969 (14.3)        |
| Vomit                    | 2353 (8.6)       | 1237 (9.0)            | 1116 (8.1)         |
| Abdominal pain           | 3643 (13.3)      | 2034 (14.8)           | 1609 (11.7)        |
| Conjunctivitis           | 3532 (12.9)      | 1913 (13.9)           | 1619 (11.8)        |
| Cyanosis                 | 1420 (5.2)       | 808 (5.9)             | 612 (4.5)          |
| Sudden onset of symptoms | 10253 (37.3)     | 5089 (37.0)           | 5164 (37.6)        |

Data expressed as frequency (%) or mean (SD)

SD: Standard deviation, COPD: Chronic obstructive pulmonary disease, HIV/AIDS: Human immunodeficiency virus/acquired immune deficiency syndrome

**Supplementary Table 20:** Baseline characteristics of 903 patients with data of timing of initiation of antiviral treatment with laboratory-confirmed COVID-19, who received medical attention in one of 154 accredited medical units in Mexico City

|                                           | Total<br>n=903 | Acyclovir<br>n=26 | Amantadine<br>n=131 | Lopinavir-Ritonavir<br>n=9 | Oseltamivir<br>n=702 | Rimantadine<br>n=24 | Zanamivir<br>n=11 |
|-------------------------------------------|----------------|-------------------|---------------------|----------------------------|----------------------|---------------------|-------------------|
| <b>Sex</b>                                |                |                   |                     |                            |                      |                     |                   |
| Women                                     | 403 (44.6)     | 14 (53.8)         | 72 (55)             | 2 (22.2)                   | 294 (41.9)           | 13 (54.2)           | 8 (72.7)          |
| Men                                       | 500 (55.4)     | 12 (46.2)         | 59 (45)             | 7 (77.8)                   | 408 (58.1)           | 11 (45.8)           | 3 (27.3)          |
| Age, mean (SD)                            | 46.7 (14.8)    | 44.5 (13.9)       | 42.3 (14.3)         | 51 (11.1)                  | 47.8 (14.8)          | 42.6 (13.9)         | 40 (13.9)         |
| <b>Age categories</b>                     |                |                   |                     |                            |                      |                     |                   |
| 0-19 years                                | 17 (1.9)       | 0 (0)             | 5 (3.8)             | 0 (0)                      | 11 (1.6)             | 1 (4.2)             | 0 (0)             |
| 20-29 years                               | 88 (9.7)       | 5 (19.2)          | 18 (13.7)           | 0 (0)                      | 62 (8.8)             | 1 (4.2)             | 2 (18.2)          |
| 30-39 years                               | 204 (22.6)     | 5 (19.2)          | 40 (30.5)           | 0 (0)                      | 147 (20.9)           | 8 (33.3)            | 4 (36.4)          |
| 40-49 years                               | 220 (24.4)     | 7 (26.9)          | 26 (19.8)           | 5 (55.6)                   | 170 (24.2)           | 10 (41.7)           | 2 (18.2)          |
| 50-59 years                               | 192(21.3)      | 4 (15.4)          | 25 (19.1)           | 2 (22.2)                   | 157 (22.4)           | 2 (8.3)             | 2 (18.2)          |
| 60-69 years                               | 118 (13.1)     | 5 (19.2)          | 11 (8.4)            | 1 (11.1)                   | 100 (14.2)           | 0 (0)               | 1 (9.1)           |
| 70-79 years                               | 51 (5.6)       | 0 (0)             | 5 (3.8)             | 1 (11.1)                   | 43 (6.1)             | 2 (8.3)             | 0 (0)             |
| 80-89 years                               | 10 (1.1)       | 0 (0)             | 1 (0.8)             | 0 (0)                      | 9 (1.3)              | 0 (0)               | 0 (0)             |
| 90-99 years                               | 3 (0.3)        | 0 (0)             | 0 (0)               | 0 (0)                      | 3 (0.4)              | 0 (0)               | 0 (0)             |
| Indigenous self-identification            | 10 (1.1)       | 0 (0)             | 1 (0.8)             | 0 (0)                      | 7 (1)                | 0 (0)               | 2 (18.2)          |
| <b>Occupation</b>                         |                |                   |                     |                            |                      |                     |                   |
| Technical services                        | 29 (3.2)       | 0 (0)             | 3 (2.3)             | 0 (0)                      | 25 (3.6)             | 0 (0)               | 1 (9.1)           |
| Education                                 | 34 (3.8)       | 0 (0)             | 8 (6.1)             | 0 (0)                      | 25 (3.6)             | 1 (4.2)             | 0 (0)             |
| Healthcare                                | 117 (13)       | 2 (7.7)           | 12 (9.2)            | 2 (22.2)                   | 97 (13.8)            | 4 (16.7)            | 0 (0)             |
| Agricultural activities                   | 2 (0.2)        | 0 (0)             | 0 (0)               | 0 (0.0)                    | 2 (0.3)              | 0 (0)               | 0 (0)             |
| Commerce                                  | 327 (36.2)     | 12 (46.2)         | 53 (40.5)           | 0 (0.0)                    | 251 (35.8)           | 8 (33.3)            | 3 (27.3)          |
| Other                                     | 197 (21.8)     | 5 (19.2)          | 31 (23.7)           | 6 (66.7)                   | 149 (21.2)           | 5 (20.8)            | 1 (9.1)           |
| Unemployed                                | 17 (1.9)       | 0 (0)             | 0 (0)               | 1 (11.1)                   | 15 (2.1)             | 1 (4.2)             | 0 (0)             |
| Stay-at-home                              | 180 (19.9)     | 7 (26.9)          | 24 (18.3)           | 0 (0)                      | 138 (19.7)           | 5 (20.8)            | 6 (54.5)          |
| Last-season flu vaccination               | 222 (24.6)     | 5 (19.2)          | 38 (29)             | 1 (11.1)                   | 173 (24.6)           | 4 (16.7)            | 1 (9.1)           |
| <b>Special populations</b>                |                |                   |                     |                            |                      |                     |                   |
| Children and adolescents (<18 years)      | 11 (1.2)       | 0 (0.0)           | 3 (2.3)             | 0 (0)                      | 7 (1)                | 1 (4.2)             | 0 (0)             |
| Age, mean (SD)                            | 11.6 (5.5)     | -                 | 11 (7.8)            | -                          | 11.9 (5.5)           | 12                  | -                 |
| Last-season flu vaccination               | 2 (18.2)       | 0 (0)             | 0 (0)               | 0 (0)                      | 2 (28.6)             | 0 (0)               | 0 (0)             |
| Non-pregnant/puerperal adults (≥18 years) | 890 (98.6)     | 26 (100)          | 128 (97.7)          | 9 (100)                    | 693 (98.7)           | 23 (95.8)           | 11 (100)          |
| Age, mean (SD)                            | 47.2 (14.3)    | 44.5 (13.9)       | 42.9 (13.6)         | 51 (11.1)                  | 48.2 (14.2)          | 43.9 (12.6)         | 40 (12.9)         |
| Last-season flu vaccination               | 220 (24.7)     | 5 (19.2)          | 38 (29.7)           | 1 (11.1)                   | 171 (24.7)           | 4 (17.4)            | 1 (9.1)           |

|                                  | Total<br>n=903 | Acyclovir<br>n=26 | Amantadine<br>n=131 | Lopinavir-Ritonavir<br>n=9 | Oseltamivir<br>n=702 | Rimantadine<br>n=24 | Zanamivir<br>n=11 |
|----------------------------------|----------------|-------------------|---------------------|----------------------------|----------------------|---------------------|-------------------|
| <b>Comorbidities</b>             |                |                   |                     |                            |                      |                     |                   |
| Diabetes                         | 138 (15.3)     | 0 (0)             | 10 (7.6)            | 2 (22.2)                   | 123 (17.5)           | 3 (12.5)            | 0 (0)             |
| COPD                             | 12 (1.3)       | 0 (0)             | 2 (1.5)             | 0 (0)                      | 10 (1.4)             | 0 (0)               | 0 (0)             |
| Asthma                           | 23 (2.5)       | 1 (3.8)           | 3 (2.3)             | 1 (11.1)                   | 18 (2.6)             | 0 (0)               | 0 (0)             |
| Immunosuppression                | 14 (1.6)       | 0 (0)             | 5 (3.8)             | 0 (0)                      | 9 (1.3)              | 0 (0)               | 0 (0)             |
| Hypertension                     | 166 (18.4)     | 4 (15.4)          | 11 (8.4)            | 0 (0)                      | 147 (20.9)           | 3 (12.5)            | 1 (9.1)           |
| HIV/AIDS                         | 2 (0.2)        | 0 (0)             | 0 (0)               | 0 (0)                      | 2 (0.3)              | 0 (0)               | 0 (0)             |
| Cardiovascular disease           | 27 (1.6)       | 2 (7.7)           | 1 (0.8)             | 1 (11.1)                   | 23 (3.3)             | 0 (0)               | 0 (0)             |
| Obesity                          | 241 (3)        | 9 (34.6)          | 41 (31.3)           | 2 (22.2)                   | 182 (25.9)           | 3 (12.5)            | 4 (36.4)          |
| Chronic kidney disease           | 17 (26.7)      | 0 (0)             | 0 (0)               | 0 (0)                      | 17 (2.4)             | 0 (0)               | 0 (0)             |
| Smoker                           | 107 (1.9)      | 0 (0)             | 20 (15.3)           | 1 (11.1)                   | 82 (11.7)            | 2 (8.3)             | 2 (18.2)          |
| <b>Type of medical attention</b> |                |                   |                     |                            |                      |                     |                   |
| Ambulatory                       | 675 (74.8)     | 26 (100)          | 127 (96.9)          | 0 (0)                      | 491 (69.9)           | 22 (91.7)           | 9 (81.8)          |
| Hospitalization                  | 228 (25.2)     | 0 (0)             | 4 (3.1)             | 9 (10)                     | 211 (30.1)           | 2 (8.3)             | 2 (18.2)          |
| <b>Severity of the disease</b>   |                |                   |                     |                            |                      |                     |                   |
| Non-critical                     | 833 (92.2)     | 26 (100)          | 130 (99.2)          | 4 (44.4)                   | 638 (90.9)           | 24 (100)            | 11 (100)          |
| Critical                         | 70 (7.8)       | 0 (0)             | 1 (0.8)             | 5 (55.6)                   | 64 (9.1)             | 0 (0)               | 0 (0)             |
| <b>Baseline symptoms</b>         |                |                   |                     |                            |                      |                     |                   |
| Fever                            | 643 (71.2)     | 20 (76.9)         | 82 (62.6)           | 9 (100)                    | 511 (72.8)           | 12 (50)             | 9 (81.8)          |
| Cough                            | 675 (74.8)     | 17 (65.4)         | 98 (74.8)           | 7 (77.8)                   | 527 (75.1)           | 17 (70.8)           | 9 (81.8)          |
| Sore throat                      | 434 (48.1)     | 10 (38.5)         | 63 (48.1)           | 3 (33.3)                   | 338 (48.1)           | 14 (58.3)           | 6 (54.5)          |
| Shortness of breath              | 402 (44.5)     | 11 (42.3)         | 36 (27.5)           | 6 (66.7)                   | 335 (47.7)           | 9 (37.5)            | 5 (45.5)          |
| Irritability                     | 199 (22)       | 5 (19.2)          | 23 (17.6)           | 1 (11.1)                   | 158 (22.5)           | 6 (25)              | 6 (54.5)          |
| Diarrhea                         | 285 (31.6)     | 9 (34.6)          | 39 (29.8)           | 1 (11.1)                   | 226 (32.2)           | 4 (16.7)            | 6 (54.5)          |
| Chest pain                       | 330 (36.5)     | 8 (30.8)          | 37 (28.2)           | 3 (33.3)                   | 266 (37.9)           | 9 (37.5)            | 7 (63.6)          |
| Chills                           | 434 (48.1)     | 12 (46.2)         | 60 (45.8)           | 3 (33.3)                   | 342 (48.7)           | 11 (45.8)           | 6 (54.5)          |
| Headache                         | 645 (71.4)     | 19 (73.1)         | 93 (71)             | 7 (77.8)                   | 502 (71.5)           | 15 (62.5)           | 9 (81.8)          |
| Myalgias                         | 590 (65.3)     | 20 (76.9)         | 78 (59.5)           | 5 (55.6)                   | 464 (66.1)           | 15 (62.5)           | 8 (72.7)          |
| Arthralgias                      | 552 (61.1)     | 16 (61.5)         | 73 (55.7)           | 5 (55.6)                   | 436 (62.1)           | 16 (66.7)           | 6 (54.5)          |
| Abrupt deterioration             | 556 (61.6)     | 15 (57.7)         | 77 (58.8)           | 6 (66.7)                   | 440 (62.7)           | 12 (50)             | 6 (54.5)          |
| Rhinorrhea                       | 294 (32.6)     | 5 (19.2)          | 45 (34.4)           | 1 (11.1)                   | 229 (32.6)           | 10 (41.7)           | 4 (36.4)          |
| Polypnea                         | 171 (18.9)     | 3 (11.5)          | 22 (16.8)           | 1 (11.1)                   | 141 (20.1)           | 2 (8.3)             | 2 (18.2)          |
| Vomit                            | 106 (11.7)     | 2 (7.7)           | 9 (6.9)             | 1 (11.1)                   | 90 (12.8)            | 3 (12.5)            | 1 (9.1)           |
| Abdominal pain                   | 153 (16.9)     | 1 (3.8)           | 17 (13)             | 2 (22.2)                   | 127 (18.1)           | 3 (12.5)            | 3 (27.3)          |
| Conjunctivitis                   | 157 (17.4)     | 4 (15.4)          | 20 (15.3)           | 1 (11.1)                   | 123 (17.5)           | 5 (20.8)            | 4 (36.4)          |

|                                      | <b>Total<br/>n=903</b> | <b>Acyclovir<br/>n=26</b> | <b>Amantadine<br/>n=131</b> | <b>Lopinavir-Ritonavir<br/>n=9</b> | <b>Oseltamivir<br/>n=702</b> | <b>Rimantadine<br/>n=24</b> | <b>Zanamivir<br/>n=11</b> |
|--------------------------------------|------------------------|---------------------------|-----------------------------|------------------------------------|------------------------------|-----------------------------|---------------------------|
| Cyanosis                             | 67 (7.4)               | 1 (3.8)                   | 7 (5.3)                     | 1 (11.1)                           | 56 (8)                       | 1 (4.2)                     | 1 (9.1)                   |
| Sudden onset of symptoms             | 349 (38.6)             | 7 (26.9)                  | 47 (35.9)                   | 5 (55.6)                           | 274 (3)                      | 12 (50)                     | 4 (36.4)                  |
| Concomitant use of antibiotics       | 566 (62.7)             | 22 (84.6)                 | 84 (64.1)                   | 5 (55.6)                           | 434 (61.8)                   | 15 (62.5)                   | 6 (54.5)                  |
| <b>Timing of antiviral treatment</b> |                        |                           |                             |                                    |                              |                             |                           |
| Before medical attention             | 783 (86.7)             | 19 (73.1)                 | 121 (92.4)                  | 7 (77.8)                           | 603 (85.9)                   | 23 (95.8)                   | 10 (90.9)                 |
| After medical attention              | 120 (13.3)             | 7 (26.9)                  | 10 (7.6)                    | 2 (22.2)                           | 99 (14.1)                    | 1 (4.2)                     | 1 (9.1)                   |
| ≤2 days after symptom onset          | 579 (64.2)             | 8 (30.8)                  | 99 (75.6)                   | 1 (11.1)                           | 448 (63.9)                   | 16 (66.7)                   | 7 (63.6)                  |
| >2 days after symptom onset          | 323 (35.8)             | 18 (69.2)                 | 32 (24.4)                   | 8 (88.9)                           | 253 (36.1)                   | 8 (33.3)                    | 4 (36.4)                  |

Data expressed as frequency (%) or mean (SD)

SD: Standard deviation, COPD: Chronic obstructive pulmonary disease, HIV/AIDS: Human immunodeficiency virus/acquired immune deficiency syndrome

**Supplementary Table 21:** Survival analysis of laboratory-confirmed COVID-19 patients according to early or late use of antivirals

| Group                                    | Total  | Deaths | Survivors | Survival | p value   |
|------------------------------------------|--------|--------|-----------|----------|-----------|
| Early use of antivirals ( $\leq 2$ days) | 579    | 64     | 515       | 88.9%    | -         |
| Type of antiviral                        |        |        |           |          |           |
| No antiviral/antibiotic                  | 114143 | 7351   | 106792    | 93.6%    | Reference |
| Acyclovir                                | 8      | 0      | 8         | 100%     | 0.5       |
| Amantadine                               | 99     | 2      | 97        | 98%      | 0.08      |
| Lopinavir-Ritonavir                      | 1      | 0      | 1         | 100%     | 0.8       |
| Oseltamivir                              | 448    | 62     | 386       | 86.2%    | <0.0001   |
| Rimantadine                              | 16     | 0      | 16        | 100%     | 0.3       |
| Zanamivir                                | 7      | 0      | 7         | 100%     | 0.5       |
| Late use of antivirals ( $> 2$ days)     | 323    | 28     | 295       | 91.3%    | -         |
| Type of antiviral                        |        |        |           |          |           |
| No antiviral/antibiotic                  | 114143 | 7351   | 106792    | 93.6%    | Reference |
| Acyclovir                                | 18     | 0      | 18        | 100%     | 0.3       |
| Amantadine                               | 32     | 1      | 31        | 96.9%    | 0.4       |
| Lopinavir-Ritonavir                      | 8      | 2      | 6         | 75%      | 0.03      |
| Oseltamivir                              | 253    | 15     | 228       | 90.1%    | 0.04      |
| Rimantadine                              | 8      | 0      | 8         | 100%     | 0.5       |
| Zanamivir                                | 4      | 0      | 4         | 100%     | 0.6       |

Data expressed as number of patients or percentual of survival. p values were calculated by Log-Rank test.



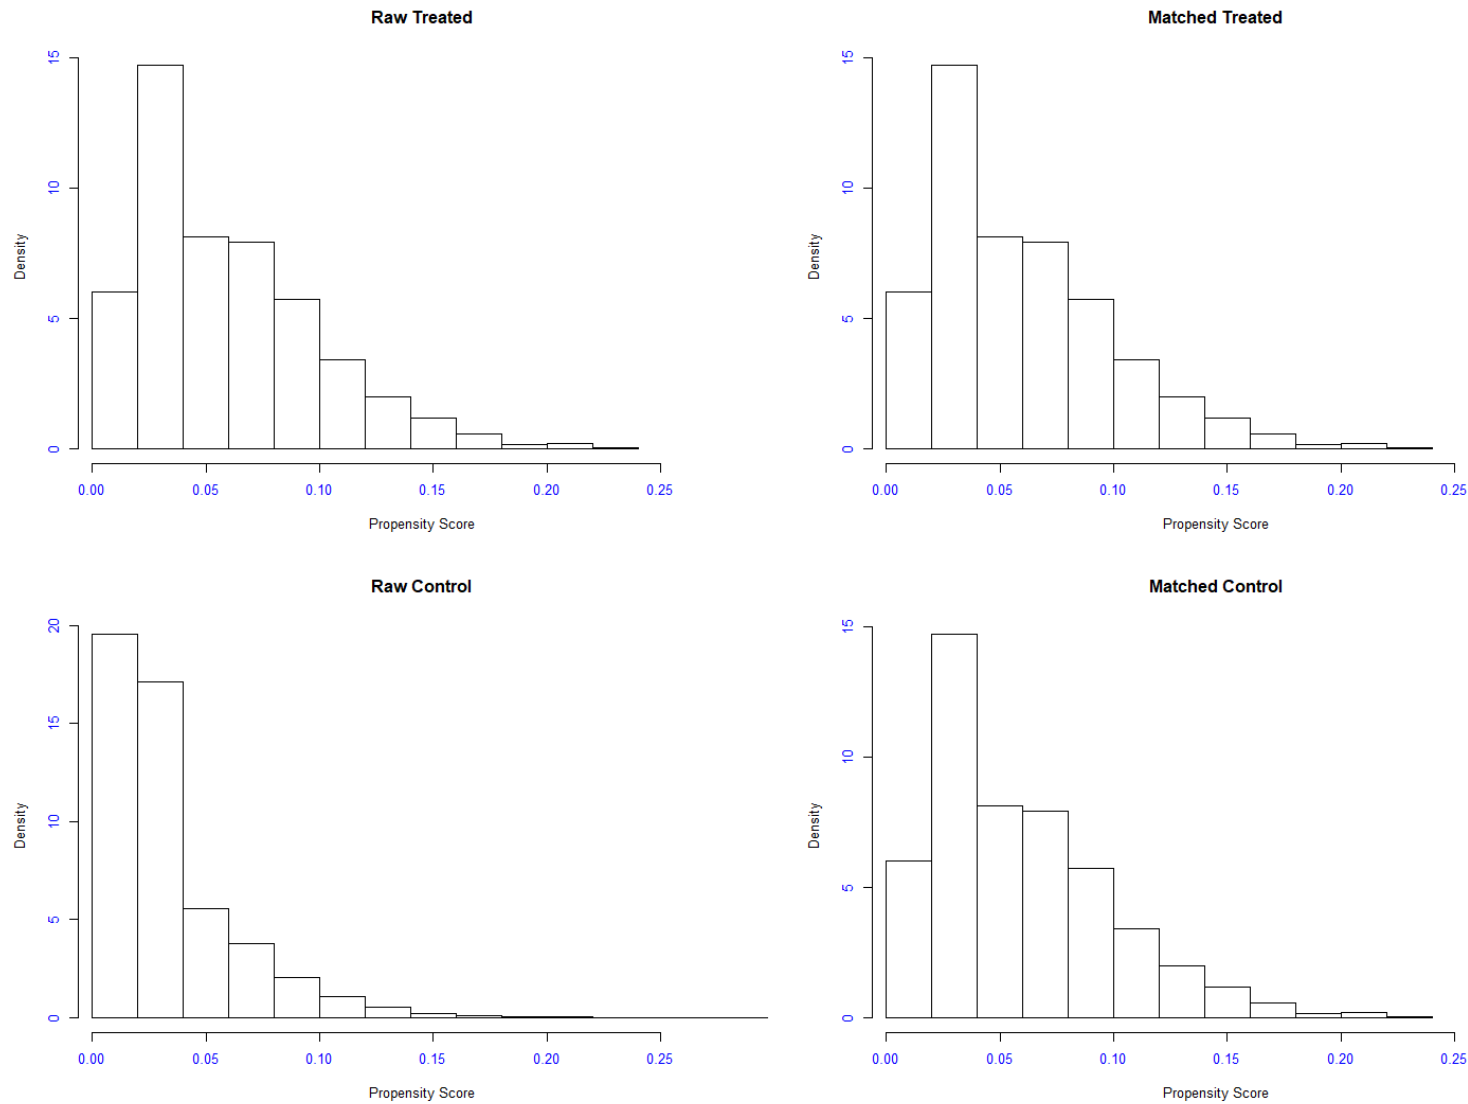

**Supplementary Figure 1:** Density functions of propensity score-matched patients treated with antivirals and controls before and after matching

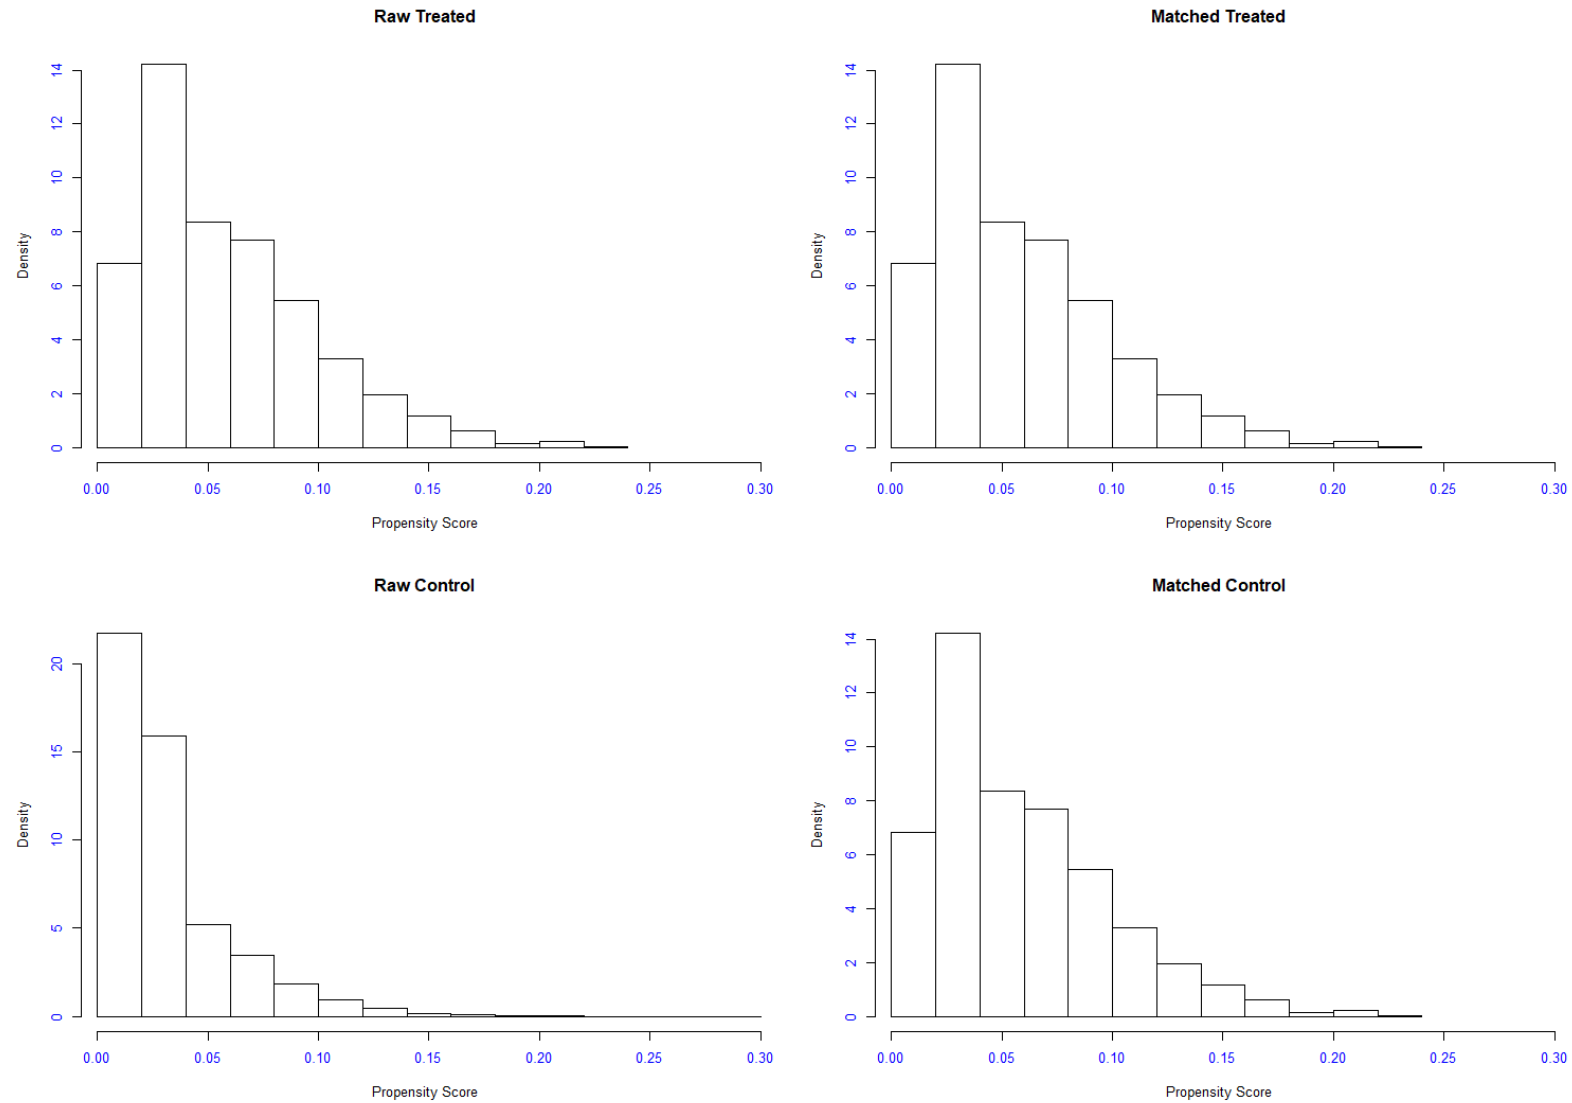

**Supplementary Figure 2:** Density functions of propensity score-matched patients treated with Oseltamivir and controls before and after matching

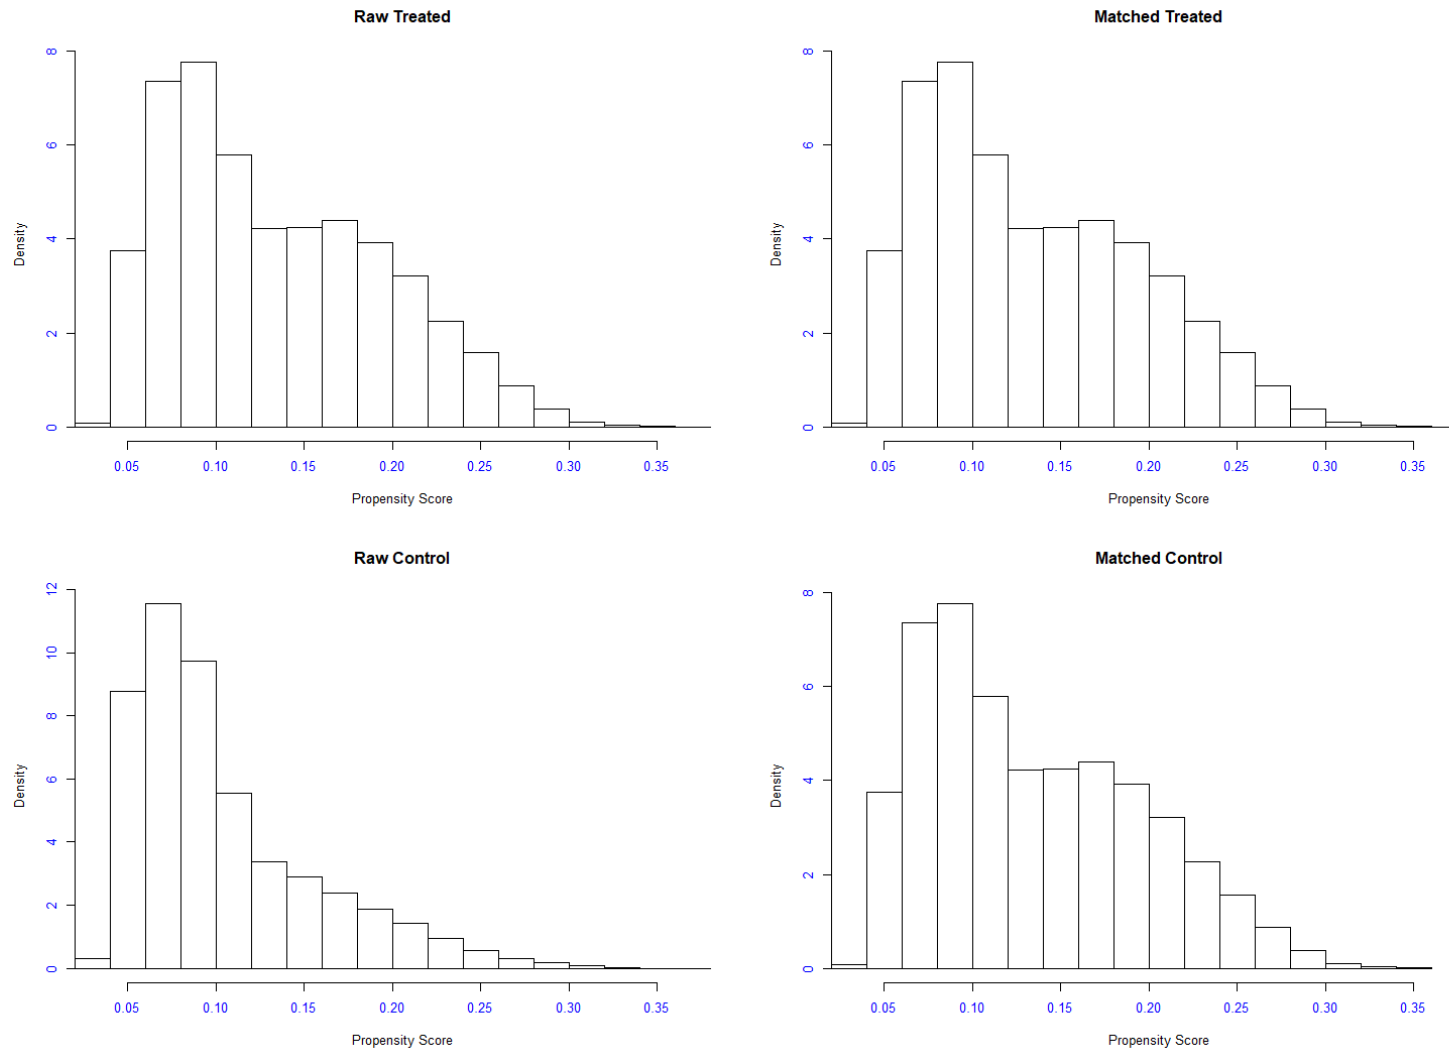

**Supplementary Figure 3:** Density functions of propensity score-matched patients treated with antibiotics and controls before and after matching

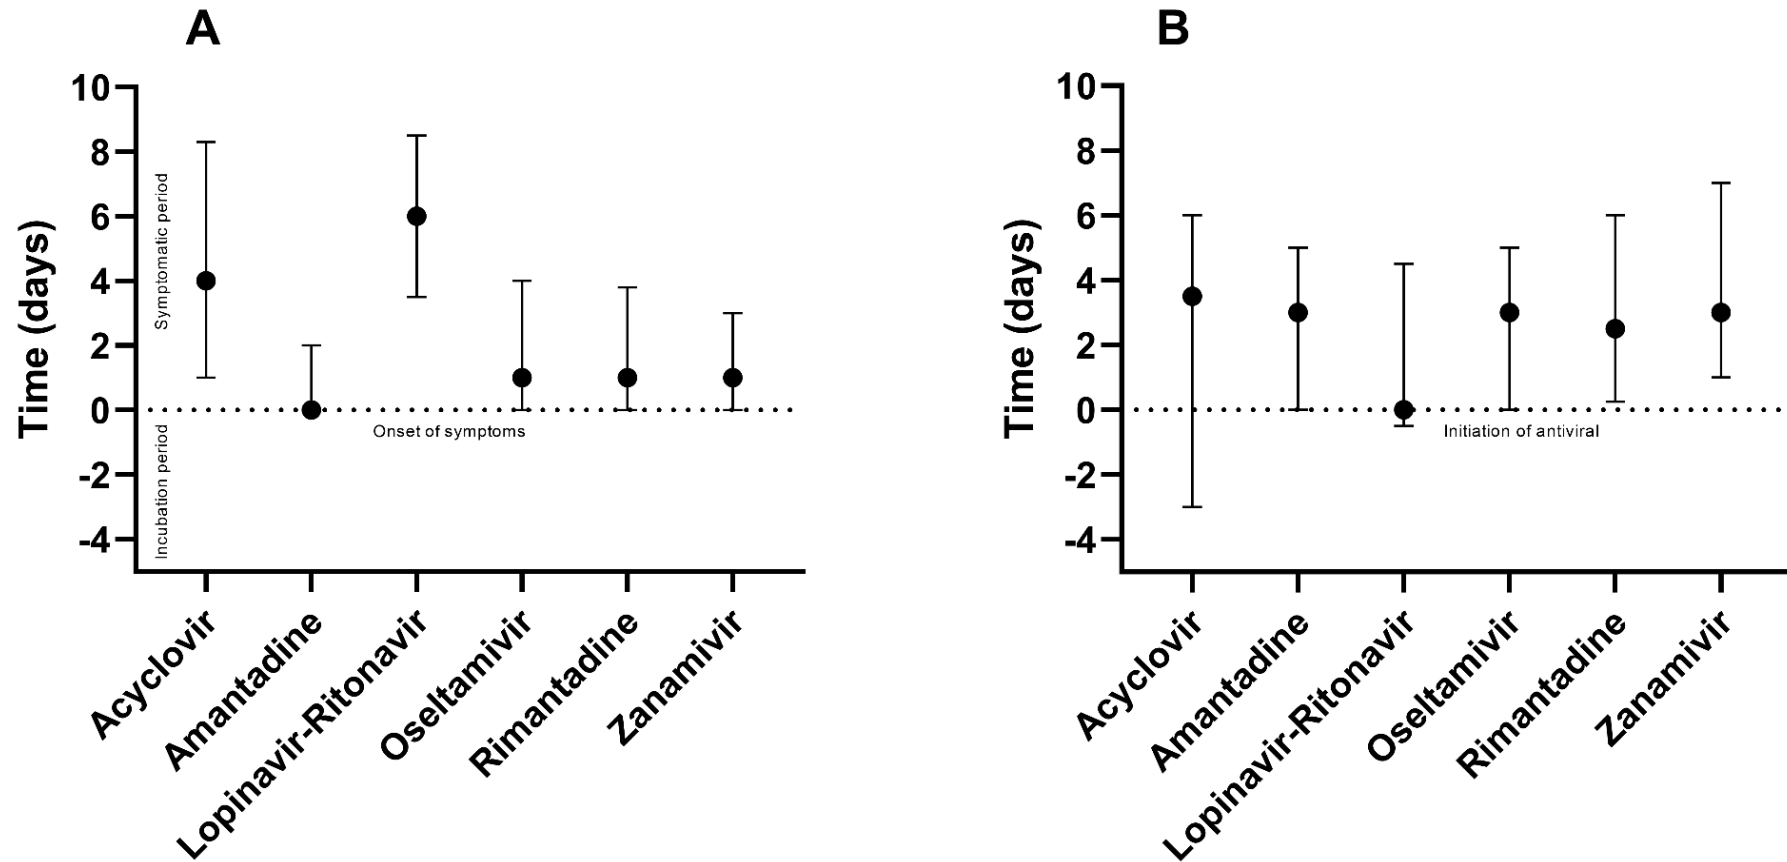

**Supplementary Figure 4:** Time from symptom onset to initiation of antivirals (**A**) and time from initiation of antivirals to hospitalization (**B**) in 903 patients with laboratory-confirmed COVID-19 receiving medical attention in one of 154 accredited medical units in Mexico City

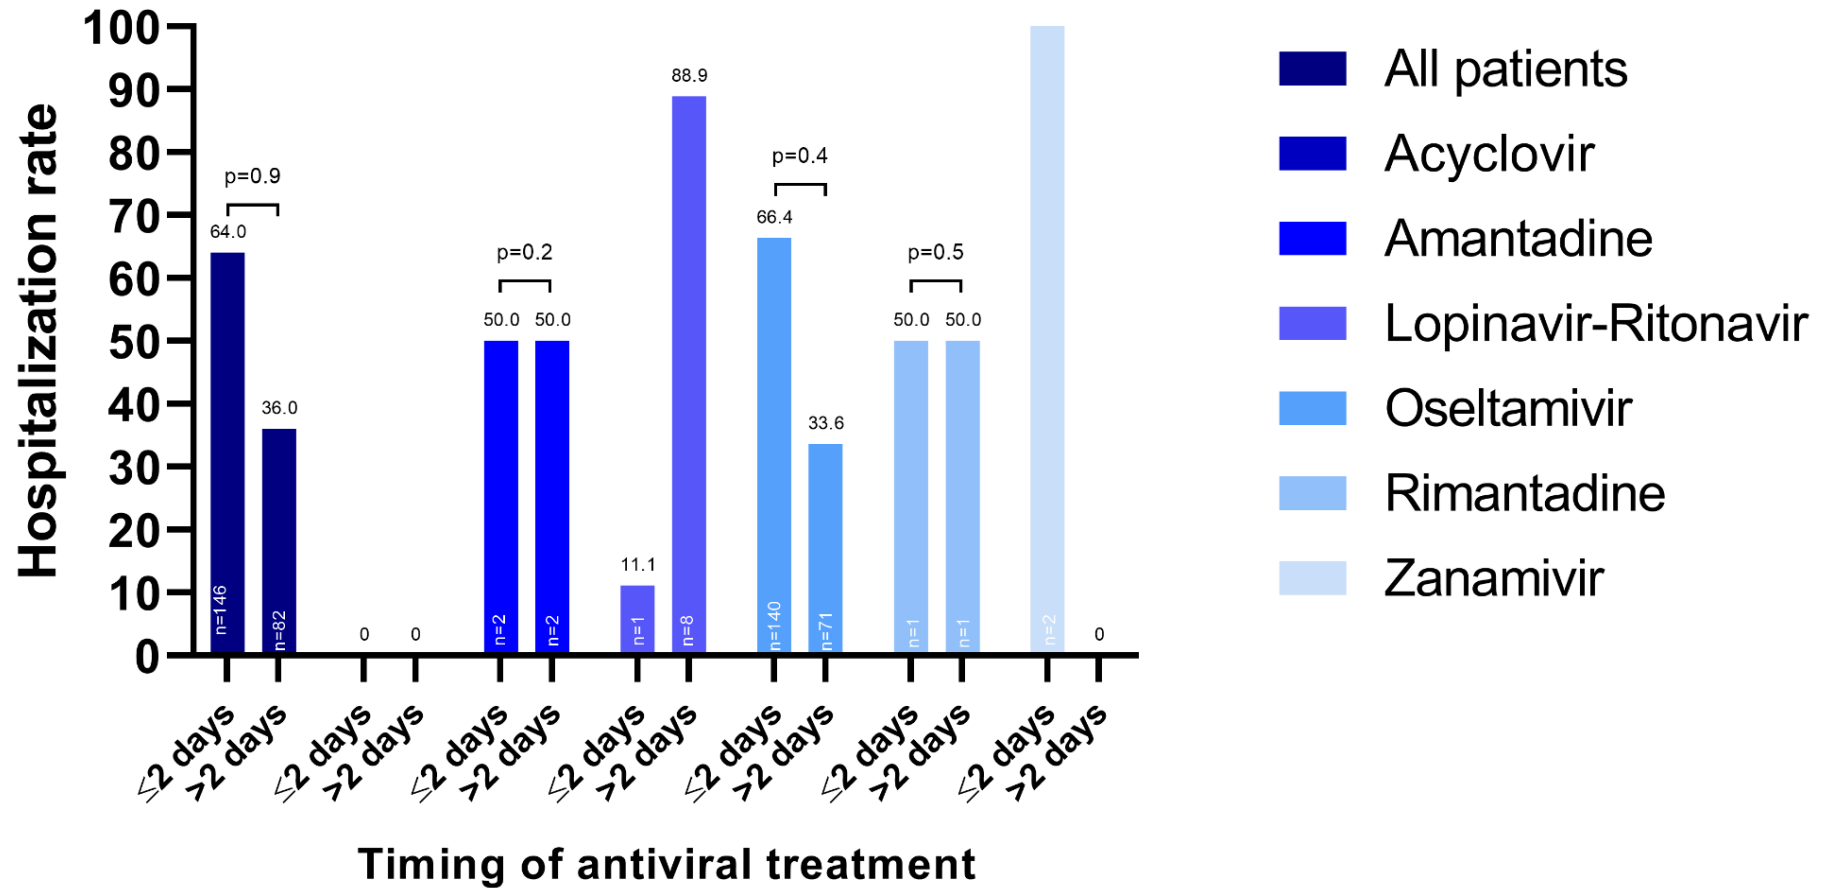

**Supplementary Figure 5:** Comparisons of hospitalization rates in 903 patients with laboratory-confirmed COVID-19 receiving medical attention in one of 154 accredited medical units in Mexico City who received early ( $\leq 2$  days) or late ( $> 2$  days) antivirals
